# Supplementary material
Source: PubMed Central journal article supplement (PMC2696236)
Supplement: NIHMS91193-supplement-1_si_001.pdf [file NIHMS91193-supplement-1_si_001.pdf]

**Table S1. Proteomic LC-MS/MS results of rat hepatocytes-derived exosomes.**

| Entry Name <sup>a</sup>              | Protein Name <sup>a</sup>                  | Score <sup>b</sup> | #Pept. <sup>b</sup> | n <sup>c</sup> | Previously identified <sup>d</sup> | Reference <sup>d</sup>     |
|--------------------------------------|--------------------------------------------|--------------------|---------------------|----------------|------------------------------------|----------------------------|
| <b>Secreted proteins</b>             |                                            |                    |                     |                |                                    |                            |
| ALBU_RAT                             | Serum albumin precursor                    | 124                | 4                   | 1              | YES                                | 1,3,5,9,10,11,12,13        |
| APOA5_RAT                            | Apolipoprotein A-V precursor / Apo-A5      | 131                | 3                   | 1              | NO                                 |                            |
| APOE_RAT                             | Apolipoprotein E precursor / Apo-E         | 2079               | 19                  | 2              | YES                                | 9,15                       |
| PON3_RAT                             | Serum paraoxonase / lactonase 3            | 75                 | 2                   | 2              | NO                                 |                            |
| PON1_RAT                             | Serum paraoxonase / arylesterase 1         | 73                 | 6                   | 2              | NO                                 |                            |
| FINC_RAT                             | Fibronectin precursor                      | 32                 | 6                   | 1              | YES                                | 1,4,11,13,14               |
| FIBB_RAT                             | Fibrinogen beta chain precursor            | 91                 | 3                   | 1              | YES                                | 10                         |
| CO4_RAT                              | Complement C4 precursor                    | 67                 | 2                   | 1              | YES                                | 10                         |
| THRB_RAT                             | Prothrombin                                | 964                | 8                   | 4              | YES                                | 13                         |
| HBA_RAT                              | Hemoglobin subunit alpha-1/2               | 59                 | 3                   | 1              | YES                                | 3,9                        |
| CLUS_RAT                             | Clusterin                                  | 1214               | 10                  | 1              | YES                                | 1                          |
| PIGR_RAT                             | Polymeric-Ig receptor precursor            | 148                | 2                   | 1              | YES                                | 1                          |
| KNG1_RAT                             | Kininogen-1 precursor                      | 61                 | 8                   | 1              | YES                                | 1                          |
| PDZD2_RAT                            | PDZ domain-containing protein 2            | 105                | 7                   | 1              | NO                                 |                            |
| DPP4_RAT                             | Dipeptidyl peptidase 4 / CD26              | 181                | 4                   | 1              | YES                                | 1,2,12                     |
| <b>Transmembrane Proteins</b>        |                                            |                    |                     |                |                                    |                            |
| CD82_RAT                             | CD82 antigen                               | 102                | 2                   | 1              | YES                                | 4                          |
| LAMP1_RAT                            | Lysosome-assoc. membr. glycoprotein 1      | 138                | 2                   | 1              | YES                                | 1,15                       |
| 4F2_RAT                              | 4F2 cell-surface antigen heavy chain       | 74                 | 2                   | 1              | NO                                 |                            |
| SDC4_RAT                             | Syndecan-4 precursor                       | 261                | 1                   | 1              | NO                                 |                            |
| PGRC1_RAT                            | Membr-associated progesterone recept. 1    | 110                | 3                   | 2              | YES                                | 15                         |
| ABCBB_RAT                            | Bile salt export pump                      | 47                 | 4                   | 1              | NO                                 |                            |
| REEP6_RAT                            | Receptor expression-enhancing protein 6    | 82                 | 1                   | 2              | NO                                 |                            |
| MOT1_RAT                             | Monocarboxylate transporter 1              | 167                | 1                   | 1              | NO                                 |                            |
| GTR1_RAT                             | Solute carrier family 2, glucose transp. 1 | 56                 | 3                   | 1              | NO                                 |                            |
| GTR2_RAT                             | Solute carrier family 2, glucose transp. 2 | 48                 | 2                   | 1              | NO                                 |                            |
| NTCP_RAT                             | Sodium/bile acid cotransporter             | 202                | 1                   | 2              | NO                                 |                            |
| AT1A1_RAT                            | Na/K-transporting ATPase 1 alpha-1         | 191                | 10                  | 2              | YES                                | 7,9,15                     |
| SO1A4_RAT                            | Solute carrier organic anion transp. 1A4   | 71                 | 4                   | 1              | NO                                 |                            |
| SO1A3_RAT                            | Solute carrier organic anion transp. 1A3   | 71                 | 2                   | 1              | NO                                 |                            |
| BASI_RAT                             | Basigin precursor / CD147 antigen          | 54                 | 2                   | 1              | NO                                 |                            |
| ASGR1_RAT                            | Asialoglycoprotein receptor 1              | 61                 | 2                   | 1              | NO                                 |                            |
| <b>Cytoskeleton-related proteins</b> |                                            |                    |                     |                |                                    |                            |
| TBA2_RAT                             | Tubulin alpha-2 chain                      | 976                | 12                  | 2              | YES                                | 5,9,13                     |
| TBA3_RAT                             | Tubulin alpha-3 chain                      | 200                | 5                   | 1              | NO                                 |                            |
| TBA6_RAT                             | Tubulin alpha-6 chain                      | 905                | 11                  | 2              | YES                                | 5                          |
| TBB2A_RAT                            | Tubulin beta-2A chain                      | 980                | 14                  | 1              | YES                                | 15                         |
| TBB2C_RAT                            | Tubulin beta-2C chain                      | 991                | 14                  | 2              | NO                                 |                            |
| TBB3_RAT                             | Tubulin beta-3 chain                       | 403                | 8                   | 2              | YES                                | 5,9                        |
| TBB5_RAT                             | Tubulin beta-5 chain                       | 900                | 15                  | 2              | YES                                | 2,3,5,9,13                 |
| ACTB_RAT                             | Actin, cytoplasmic 2                       | 2278               | 13                  | 1              | YES                                | 1,5,6,7,8,9,10,11,13,14,15 |
| ARP2_RAT                             | Actin-like protein 2                       | 40                 | 3                   | 1              | YES                                | 2,5,15                     |
| ACTN1_RAT                            | Alpha-actinin-1                            | 174                | 5                   | 1              | NO                                 |                            |
| MYH9_RAT                             | Myosin-9                                   | 377                | 6                   | 2              | YES                                | 1,2,6,14,15                |
| MYH11_RAT                            | Myosin-11                                  | 196                | 8                   | 2              | NO                                 |                            |
| MOES_RAT                             | Moesin                                     | 174                | 8                   | 1              | YES                                | 1,2,4,5,6,7,9,11,14        |

|                                                |                                           |      |    |   |     |                          |
|------------------------------------------------|-------------------------------------------|------|----|---|-----|--------------------------|
| EZRI_RAT                                       | Ezrin                                     | 50   | 5  | 1 | YES | 1,2,9,11,12,14           |
| COF1_RAT                                       | Cofilin-1                                 | 84   | 1  | 1 | YES | 1,2,3,5,6,9              |
| DYHC_RAT                                       | Dynein heavy chain, cytosolic             | 88   | 1  | 2 | YES | 13                       |
| TSC2_RAT                                       | Tuberin                                   | 33   | 1  | 1 | NO  |                          |
| <b>Small GTPases</b>                           |                                           |      |    |   |     |                          |
| RHOA_RAT                                       | Rho-related GTP-binding protein RhoA      | 57   | 1  | 1 | NO  |                          |
| RAB1A_RAT                                      | Ras-related protein Rab-1A                | 157  | 4  | 1 | YES | 1,5,15                   |
| RAB1B_RAT                                      | Ras-related protein Rab-1B                | 134  | 4  | 1 | YES | 1                        |
| RAB2A_RAT                                      | Ras-related protein Rab-2A                | 59   | 1  | 1 | YES | 1,2,4,15                 |
| RAB3A_RAT                                      | Ras-related protein Rab-3A                | 82   | 2  | 1 | NO  |                          |
| RAB7_RAT                                       | Ras-related protein Rab-7                 | 44   | 3  | 1 | YES | 1,2,3,4,5,15             |
| RB11A_RAT                                      | Ras-related protein Rab-11A               | 104  | 3  | 1 | YES | 1,5                      |
| RAB12_RAT                                      | Ras-related protein Rab-12                | 80   | 2  | 1 | YES | 9                        |
| RAB13_RAT                                      | Ras-related protein Rab-13                | 48   | 2  | 1 | YES | 1,2                      |
| RAB14_RAT                                      | Ras-related protein Rab-14                | 83   | 3  | 1 | YES | 1,2,15                   |
| RAB35_RAT                                      | Ras-related protein Rab-35                | 111  | 3  | 1 | YES | 1                        |
| RAB43_RAT                                      | Ras-related protein Rab-43                | 80   | 1  | 1 | NO  |                          |
| RAP1B_RAT                                      | Ras-related protein Rap-1b precursor      | 350  | 6  | 1 | YES | 1,3,9                    |
| RAB3D_RAT                                      | GTP-binding protein Rab-3D                | 80   | 2  | 1 | NO  |                          |
| ARF1_RAT                                       | ADP-ribosylation factor 1                 | 99   | 4  | 1 | YES | 1,15                     |
| ARF3_RAT                                       | ADP-ribosylation factor 3                 | 99   | 4  | 1 | YES | 1,5,15                   |
| RASN_RAT                                       | GTPase NRas precursor                     | 102  | 2  | 1 | NO  |                          |
| RASH_RAT                                       | GTPase HRas precursor                     | 102  | 2  | 1 | YES | 1,2                      |
| <b>Signal transduction</b>                     |                                           |      |    |   |     |                          |
| GBLP_RAT                                       | Guanine nucleotide-binding prot beta 2L1  | 162  | 7  | 2 | YES | 9                        |
| GBB4_RAT                                       | Guanine nucleotide-binding protein beta 4 | 59   | 2  | 1 | NO  |                          |
| GBB2_RAT                                       | Guan. nucleo.-binding G(I)/G(S)/G(T) β 2  | 59   | 3  | 1 | YES | 1,15                     |
| GNAS1_RAT                                      | Guanine nucleotide-binding G(s) α Xlas    | 72   | 5  | 1 | YES | 1,2,5                    |
| GNAI2_RAT                                      | Guanine nucleotide-binding G(i), α -2     | 192  | 4  | 1 | YES | 1,2,3,5,7,9,15           |
| GNAI2_RAT                                      | Guanine nucleotide-binding α -12          | 72   | 3  | 1 | NO  |                          |
| GNAO1_RAT                                      | Guanine nucleotide-binding G(o) α 1       | 72   | 1  | 1 | NO  |                          |
| 1433B_RAT                                      | 14-3-3 protein beta/alpha                 | 36   | 6  | 1 | YES | 1,2,6,9,13,14            |
| 1433E_RAT                                      | 14-3-3 protein epsilon                    | 44   | 5  | 1 | YES | 1,5,6,9                  |
| 1433G_RAT                                      | 14-3-3 protein gamma                      | 125  | 7  | 1 | YES | 1,2,3,5,9                |
| 1433Z_RAT                                      | 14-3-3 protein zeta/delta                 | 455  | 8  | 1 | YES | 1,2,3,4,5,6,9,15         |
| SND1_RAT                                       | Staphylococ. nuclease domain containing   | 234  | 7  | 1 | NO  |                          |
| RGN_RAT                                        | Regucalcin                                | 179  | 3  | 1 | NO  |                          |
| MVP_RAT                                        | Major vault protein                       | 2769 | 24 | 2 | YES | 2,13                     |
| PHB2_RAT                                       | Prohibitin-2                              | 58   | 3  | 1 | NO  |                          |
| IRS1_RAT                                       | Insulin receptor substrate 1              | 67   | 3  | 1 | NO  |                          |
| CALM_RAT                                       | Calmodulin                                | 122  | 2  | 1 | NO  |                          |
| <b>Adhesion, Membrane transport and fusion</b> |                                           |      |    |   |     |                          |
| MFGM_RAT                                       | Lactadherin/Milk fat globule-EGF fact. 8  | 443  | 9  | 1 | YES | 2,3,4,5,13               |
| ANXA2_RAT                                      | Annexin A2                                | 127  | 6  | 1 | YES | 1,2,3,4,5,11,12,13,14,15 |
| ANXA4_RAT                                      | Annexin A4                                | 150  | 5  | 1 | YES | 1,2,3,4,5,15             |
| ANXA5_RAT                                      | Annexin A5                                | 188  | 6  | 1 | YES | 1,2,3,4,5,11,13,15       |
| ANXA6_RAT                                      | Annexin A6                                | 219  | 10 | 1 | YES | 1,2,5,8,11,14            |
| CLH_RAT                                        | Clathrin heavy chain                      | 4466 | 48 | 3 | YES | 2,4,6,7,13,15            |
| CLCA_RAT                                       | Clathrin light chain A (Lca)              | 30   | 2  | 1 | NO  |                          |
| COPB_RAT                                       | Coatomer subunit beta                     | 128  | 2  | 1 | YES | 15                       |
| COPB2_RAT                                      | Coatomer subunit beta'                    | 194  | 4  | 2 | YES | 15                       |

|                                                              |                                             |      |    |   |     |                  |
|--------------------------------------------------------------|---------------------------------------------|------|----|---|-----|------------------|
| YIPF5_RAT                                                    | Protein YIPF5                               | 36   | 1  | 1 | NO  |                  |
| TMEDA_RAT                                                    | Transm. emp24 domain-containing p. 10       | 97   | 3  | 1 | NO  |                  |
| TMED2_RAT                                                    | Transm. emp24 domain-containing prot. 2     | 67   | 1  | 1 | YES | 15               |
| LMAN1_RAT                                                    | ERGIC-53 protein precursor                  | 186  | 2  | 1 | NO  |                  |
| PDC6I_RAT                                                    | AIP1/Alix                                   | 81   | 3  | 1 | YES | 1,2,3,5,6,9      |
| CEAM1_RAT                                                    | Carcinoembryonic Ag-related cell adhes.1    | 111  | 3  | 1 | NO  |                  |
| MPRD_RAT                                                     | Cation-dependent Man.-6- phosph. recept.    | 70   | 2  | 1 | YES | 15               |
| SSRG_RAT                                                     | Translocon-associated protein sub. $\gamma$ | 84   | 1  | 1 | NO  |                  |
| TERA_RAT                                                     | Transitional endoplasm. reticul. ATPase     | 115  | 6  | 2 | YES | 5,9              |
| <b>Protein synthesis and post-traductional modifications</b> |                                             |      |    |   |     |                  |
| RSSA_RAT                                                     | 40S ribosomal protein SA                    | 381  | 3  | 4 | YES | 9,13             |
| RS3_RAT                                                      | 40S ribosomal protein S3                    | 126  | 6  | 2 | YES | 5,9              |
| RS4X_RAT                                                     | 40S ribosomal protein S4, X isoform         | 31   | 3  | 1 | YES | 9                |
| RS6_RAT                                                      | 40S ribosomal protein S6                    | 41   | 3  | 2 | YES | 8,9              |
| RLA2_RAT                                                     | 60S acidic ribosomal protein P2             | 196  | 3  | 1 | NO  |                  |
| RL6_RAT                                                      | 60S ribosomal protein L6                    | 57   | 5  | 1 | YES | 2                |
| RL7_RAT                                                      | 60S ribosomal protein L7                    | 173  | 2  | 2 | YES | 13               |
| RL11_RAT                                                     | 60S ribosomal protein L11                   | 58   | 3  | 1 | NO  |                  |
| EF1A1_RAT                                                    | Elongation factor 1-alpha 1                 | 189  | 5  | 1 | YES | 1,2,3,5,6,7,9,13 |
| EF1A2_RAT                                                    | Elongation factor 1-alpha 2                 | 122  | 5  | 2 | YES | 9                |
| EF2_RAT                                                      | Elongation factor 2                         | 170  | 9  | 1 | YES | 2,6,9,13         |
| SYV_RAT                                                      | Valyl-tRNA synthetase                       | 123  | 2  | 1 | NO  |                  |
| SYTC_RAT                                                     | Threonyl-tRNA synthetase, cytoplasmic       | 58   | 2  | 1 | NO  |                  |
| RIB1_RAT                                                     | Dolic.-DPoligosaccharide glycos. 67 kDa     | 40   | 1  | 1 | NO  |                  |
| GLCNE_RAT                                                    | UDP-GlcNAc-2-epimerase                      | 131  | 4  | 1 | NO  |                  |
| <b>Protein Folding</b>                                       |                                             |      |    |   |     |                  |
| HS70L_RAT                                                    | Heat shock 70 kDa protein 1L                | 854  | 8  | 2 | NO  |                  |
| HSP71_RAT                                                    | Heat shock 70 kDa protein 1A/1B             | 807  | 9  | 2 | YES | 1,4,13,14        |
| TRAP1_RAT                                                    | Heat shock protein 75 kDa, mitochondrial    | 184  | 1  | 4 | YES | 4,9,13           |
| HSP7C_RAT                                                    | Heat shock cognate 71 kDa prot. / Hsc73     | 1239 | 13 | 2 | YES | 1,3,5,6,11,12    |
| GRP78_RAT                                                    | 78 kDa glucose-regulated protein            | 1119 | 16 | 2 | YES | 1,7              |
| HS90A_RAT                                                    | Heat shock protein HSP 90-alpha / Hsp86     | 386  | 9  | 3 | YES | 1,4,6,7,9,11,14  |
| HS90B_RAT                                                    | Heat shock protein HSP 90-beta / Hsp84      | 480  | 11 | 4 | YES | 1,3,4,5,9,11,13  |
| TCPA_RAT                                                     | T-complex protein 1 subunit alpha           | 159  | 8  | 1 | YES | 9                |
| TCPB_RAT                                                     | T-complex protein 1 subunit beta            | 164  | 5  | 2 | YES | 2,9,13           |
| TCPD_RAT                                                     | T-complex protein 1 subunit delta           | 132  | 2  | 2 | YES | 2,9              |
| TCPE_RAT                                                     | T-complex protein 1 subunit epsilon         | 81   | 5  | 1 | YES | 2,13             |
| TCPG_RAT                                                     | T-complex protein 1 subunit gamma           | 188  | 6  | 2 | YES | 9,13             |
| CALX_RAT                                                     | Calnexin precursor                          | 74   | 3  | 2 | NO  |                  |
| PDIA1_RAT                                                    | Protein disulfide-isomerase precursor       | 439  | 8  | 1 | YES | 1,9              |
| PDIA3_RAT                                                    | Protein disulfide-isomerase A3 precursor    | 453  | 13 | 2 | YES | 9                |
| PDIA4_RAT                                                    | Protein disulfide-isomerase A4 precursor    | 103  | 6  | 1 | NO  |                  |
| PDIA6_RAT                                                    | Protein disulfide-isomerase A6 precursor    | 201  | 5  | 1 | NO  |                  |
| CALR_RAT                                                     | Calregulin / Calreticulin precursor         | 85   | 4  | 1 | YES | 1                |
| <b>Processing and degradation Protein</b>                    |                                             |      |    |   |     |                  |
| AMPN_RAT                                                     | Aminopeptidase N / CD13                     | 171  | 4  | 2 | YES | 1,2,6,8,15       |
| MEP1A_RAT                                                    | Meprin A sub $\alpha$ / Endopeptidase-2     | 51   | 4  | 1 | NO  |                  |
| PRS6A_RAT                                                    | 26S protease regulatory subunit 6A          | 52   | 1  | 1 | YES | 9                |
| UBIQ_RAT                                                     | Ubiquitin                                   | 1186 | 4  | 2 | YES | 1,6,9,15         |
| CAND1_RAT                                                    | Cullin-associated NEDD8-dissociated p. 1    | 123  | 2  | 1 | NO  |                  |

| <b>Lipid Metabolism</b>                       |                                          |      |    |   |     |                       |
|-----------------------------------------------|------------------------------------------|------|----|---|-----|-----------------------|
| ACLY_RAT                                      | ATP-citrate synthase                     | 1608 | 15 | 2 | YES | 1,9                   |
| FAS_RAT                                       | Fatty acid synthase                      | 4712 | 45 | 3 | YES | 2,13                  |
| ACADL_RAT                                     | Long-chain specific acyl-CoA dehydrog.   | 76   | 3  | 2 | NO  |                       |
| ACSL1_RAT                                     | Long-chain-fatty-acid-CoA ligase 1       | 196  | 8  | 3 | NO  |                       |
| ACSL5_RAT                                     | Long-chain-fatty-acid-CoA ligase 5       | 49   | 6  | 1 | NO  |                       |
| ACSL6_RAT                                     | Long-chain-fatty-acid-CoA ligase 6       | 63   | 1  | 3 | NO  |                       |
| ECHP_RAT                                      | Peroxisomal bifunctional enzyme          | 163  | 2  | 2 | NO  |                       |
| ACOX2_RAT                                     | Acyl-coenzyme A oxidase 2, peroxisomal   | 60   | 1  | 2 | NO  |                       |
| LPP60_RAT                                     | 60 kDa lysophospholipase                 | 53   | 1  | 1 | NO  |                       |
| THIM_RAT                                      | 3-ketoacyl-CoA thiolase, mitochondrial   | 51   | 1  | 1 | NO  |                       |
| COA1_RAT                                      | Acetyl-CoA carboxylase 1                 | 388  | 8  | 1 | NO  |                       |
| HMCS2_RAT                                     | Hydroxymethylglutaryl-CoA synthase       | 191  | 2  | 3 | NO  |                       |
| MET7B_RAT                                     | Methyltransferase-like protein 7B        | 72   | 1  | 1 | NO  |                       |
| <b>Carbohydrate and Amino-acid Metabolism</b> |                                          |      |    |   |     |                       |
| ENOA_RAT                                      | Alpha-enolase                            | 124  | 4  | 1 | YES | 1,4,5,6,7,11,12,13,14 |
| F16P1_RAT                                     | Fructose-1,6-bisphosphatase 1            | 150  | 2  | 3 | NO  |                       |
| ALDOA_RAT                                     | Fructose-bisphosphate aldolase A         | 81   | 3  | 1 | YES | 1,7,9                 |
| ALDOB_RAT                                     | Fructose-bisphosphate aldolase B         | 446  | 6  | 2 | YES | 1                     |
| G3P_RAT                                       | GAPDH                                    | 883  | 8  | 4 | YES | 1,2,5,6,7,9,11,13     |
| PPCKC_RAT                                     | Phosphoenolpyruvate carboxykinase, cyt.  | 334  | 7  | 1 | NO  |                       |
| KPYR_RAT                                      | Pyruvate kinase isozymes R/L             | 1356 | 17 | 3 | YES | 9                     |
| PYC_RAT                                       | Pyruvate carboxylase, mitochondrial      | 99   | 4  | 1 | YES | 13                    |
| PGK1_RAT                                      | Phosphoglycerate kinase 1                | 30   | 3  | 1 | YES | 1,2,5,6,9,13          |
| GCKR_RAT                                      | Glucokinase regulatory protein           | 69   | 3  | 1 | NO  |                       |
| GLPK_RAT                                      | Glycerol kinase                          | 92   | 3  | 1 | NO  |                       |
| AL7A1_RAT                                     | Aldehyde dehydrogenase family 7-A1       | 35   | 1  | 1 | NO  |                       |
| AL9A1_RAT                                     | 4-trimethylaminobutyraldehyde dehydrog.  | 853  | 15 | 4 | NO  |                       |
| AL3A2_RAT                                     | Fatty aldehyde dehydrogenase             | 208  | 4  | 2 | NO  |                       |
| AL1B1_RAT                                     | Aldehyde dehydrogenase X                 | 66   | 1  | 1 | NO  |                       |
| ALDH2_RAT                                     | Aldehyde dehydrogenase, mitochondrial    | 83   | 3  | 1 | NO  |                       |
| LDHA_RAT                                      | L-lactate dehydrogenase A chain          | 84   | 3  | 1 | YES | 1,5                   |
| DHSA_RAT                                      | Succinate dehydro [ubiquinone] flavoprot | 90   | 1  | 1 | NO  |                       |
| XYLB_RAT                                      | Xylulose kinase                          | 132  | 2  | 1 | NO  |                       |
| MDHC_RAT                                      | Malate dehydrogenase, cytoplasmic        | 63   | 3  | 1 | YES | 1,13                  |
| MMSA_RAT                                      | Methylmalonate-semialdehyde dehydrog.    | 56   | 2  | 1 | NO  |                       |
| UGDH_RAT                                      | UDP-glucose 6-dehydrogenase              | 425  | 9  | 1 | NO  |                       |
| CGL_RAT                                       | Cystathionine gamma-lyase                | 592  | 8  | 3 | NO  |                       |
| ADK_RAT                                       | Adenosine kinase                         | 48   | 1  | 1 | NO  |                       |
| SARDH_RAT                                     | Sarcosine dehydrogenase, mitochondrial   | 75   | 1  | 1 | NO  |                       |
| C1TC_RAT                                      | C-1-tetrahydrofolate synthase, cytop.    | 865  | 15 | 3 | NO  |                       |
| FTHFD_RAT                                     | 10-formyltetrahydrofolate dehydrogenase  | 1356 | 18 | 4 | NO  |                       |
| FTCD_RAT                                      | Formimidoyltransferase-cyclodeaminase    | 1060 | 16 | 2 | NO  |                       |
| CBS_RAT                                       | Cystathionine beta-synthase              | 99   | 3  | 1 | NO  |                       |
| SAHH_RAT                                      | Adenosylhomocysteinase                   | 62   | 3  | 3 | YES | 5                     |
| BHMT1_RAT                                     | Betaine--homocysteine S-methyltransfer 1 | 286  | 4  | 2 | YES | 1                     |
| BHMT2_RAT                                     | Betaine--homocysteine S-methyltransfer 2 | 210  | 2  | 1 | NO  |                       |
| CSAD_RAT                                      | Cysteine sulfinic acid decarboxylase     | 412  | 7  | 3 | NO  |                       |
| ARGI1_RAT                                     | Arginase-1                               | 502  | 3  | 2 | NO  |                       |
| ASSY_RAT                                      | Argininosuccinate synthase               | 182  | 9  | 4 | YES | 1                     |
| ARLY_RAT                                      | Argininosuccinate lyase                  | 190  | 6  | 2 | NO  |                       |

|                                                      |                                                 |      |    |   |     |           |
|------------------------------------------------------|-------------------------------------------------|------|----|---|-----|-----------|
| CPSM_RAT                                             | Carbamoyl-phosphate synthase                    | 4205 | 44 | 4 | NO  |           |
| PH4H_RAT                                             | Phenylalanine-4-hydroxylase                     | 34   | 2  | 1 | NO  |           |
| <b>Energy Metabolism</b>                             |                                                 |      |    |   |     |           |
| ATPA_RAT                                             | ATP synthase subunit alpha, mito.               | 38   | 6  | 1 | YES | 13        |
| ATPB_RAT                                             | ATP synthase subunit beta, mito.                | 329  | 5  | 3 | NO  |           |
| COX41_RAT                                            | Cytochrome c oxidase subunit 4-1, mito.         | 32   | 1  | 1 | NO  |           |
| CYB5_RAT                                             | Cytochrome b5                                   | 979  | 4  | 2 | NO  |           |
| ETFA_RAT                                             | Electron transfer flavoprotein subunit $\alpha$ | 59   | 3  | 1 | NO  |           |
| <b>Hormone Metabolism</b>                            |                                                 |      |    |   |     |           |
| 3BHS5_RAT                                            | 3 beta-hydroxysteroid dehydrog. type 5          | 58   | 2  | 1 | NO  |           |
| DHB12_RAT                                            | Estradiol 17-beta-dehydrogenase 12              | 38   | 1  | 1 | NO  |           |
| DHB13_RAT                                            | 17-beta hydroxysteroid dehydrogenase 13         | 69   | 3  | 1 | NO  |           |
| DHRS8_RAT                                            | Dehydrog./reduct. SDR family memb 8             | 43   | 1  | 1 | NO  |           |
| AK1D1_RAT                                            | 3-oxo-5-beta-steroid 4-dehydrogenase            | 223  | 8  | 2 | NO  |           |
| DIDH_RAT                                             | 3-alpha-hydroxysteroid dehydrogenase            | 90   | 3  | 3 | NO  |           |
| DHI1_RAT                                             | Corticosteroid 11-beta-dehydrog. iso 1          | 429  | 7  | 2 | NO  |           |
| RDH3_RAT                                             | Retinol dehydrogenase 3                         | 1525 | 10 | 3 | NO  |           |
| RDH7_RAT                                             | Retinol dehydrogenase 7                         | 1369 | 8  | 1 | NO  |           |
| RETST_RAT                                            | All-trans-retinol 13,14-reductase               | 74   | 1  | 3 | NO  |           |
| <b>Iron Metabolism</b>                               |                                                 |      |    |   |     |           |
| FRIH_RAT                                             | Ferritin heavy chain                            | 116  | 5  | 1 | YES | 4,9       |
| FRIL1_RAT                                            | Ferritin light chain 1                          | 224  | 3  | 1 | YES | 1,2,3,4,9 |
| IREB1_RAT                                            | Iron-responsive element-binding protein 1       | 408  | 10 | 1 | NO  |           |
| <b>Xenobiotics / Endogenous compounds Metabolism</b> |                                                 |      |    |   |     |           |
| CP2A1_RAT                                            | Cytochrome P450 2A1                             | 153  | 3  | 2 | NO  |           |
| CP2A2_RAT                                            | Cytochrome P450 2A2                             | 153  | 4  | 1 | NO  |           |
| CP4A2_RAT                                            | Cytochrome P450 4A2                             | 42   | 3  | 1 | NO  |           |
| CP2B3_RAT                                            | Cytochrome P450 2B3                             | 74   | 2  | 3 | NO  |           |
| CP2CB_RAT                                            | Cytochrome P450 2C11                            | 127  | 4  | 4 | NO  |           |
| CP2D1_RAT                                            | Cytochrome P450 2D1                             | 1041 | 16 | 2 | NO  |           |
| CP2D3_RAT                                            | Cytochrome P450 2D3                             | 1661 | 11 | 4 | NO  |           |
| CP2D4_RAT                                            | Cytochrome P450 2D18                            | 1629 | 6  | 4 | NO  |           |
| CP2DA_RAT                                            | Cytochrome P450 2D10                            | 1850 | 10 | 4 | NO  |           |
| CP2DQ_RAT                                            | Cytochrome P450 2D26                            | 1731 | 14 | 4 | NO  |           |
| UD16_RAT                                             | UDP-glucuronosyltransferase 1-6                 | 45   | 6  | 1 | NO  |           |
| UD18_RAT                                             | UDP-glucuronosyltransferase 1-8                 | 45   | 3  | 1 | NO  |           |
| UDB1_RAT                                             | UDP-glucuronosyltransferase 2B1                 | 51   | 3  | 1 | NO  |           |
| UDB2_RAT                                             | UDP-glucuronosyltransferase 2B2                 | 266  | 5  | 2 | NO  |           |
| UDB3_RAT                                             | UDP-glucuronosyltransferase 2B3                 | 194  | 4  | 2 | NO  |           |
| UDB5_RAT                                             | UDP-glucuronosyltransferase 2B5                 | 111  | 2  | 2 | NO  |           |
| NCPR_RAT                                             | NADPH--cytochrome P450 reductase                | 74   | 5  | 2 | NO  |           |
| ADH1_RAT                                             | Alcohol dehydrogenase 1                         | 157  | 6  | 3 | NO  |           |
| CES3_RAT                                             | Carboxylesterase 3 precursor                    | 222  | 6  | 1 | NO  |           |
| HYEP_RAT                                             | Epoxide hydrolase 1                             | 303  | 14 | 2 | NO  |           |
| ARK72_RAT                                            | Aflatoxin B1 aldehyde reductase memb 2          | 46   | 1  | 1 | NO  |           |
| ARK73_RAT                                            | Aflatoxin B1 aldehyde reductase memb 3          | 68   | 4  | 1 | NO  |           |
| MGST1_RAT                                            | Microsomal glutathione S-transferase 1          | 79   | 1  | 2 | NO  |           |
| GSTM1_RAT                                            | Glutathione S-transferase Mu 1                  | 107  | 2  | 1 | NO  |           |
| ST1A1_RAT                                            | Sulfotransferase 1A1                            | 46   | 1  | 2 | NO  |           |
| THTR_RAT                                             | Thiosulfate sulfurtransferase                   | 242  | 7  | 3 | NO  |           |
| FMO3_RAT                                             | Dimethylaniline monooxygenase                   | 104  | 4  | 2 | NO  |           |

|                         |                                           |     |   |   |     |              |
|-------------------------|-------------------------------------------|-----|---|---|-----|--------------|
| FMO5_RAT                | Dimethylaniline monooxygenase             | 43  | 1 | 1 | NO  |              |
| CAH3_RAT                | Carbonic anhydrase 3                      | 72  | 3 | 1 | NO  |              |
| CATA_RAT                | Catalase                                  | 107 | 5 | 2 | NO  |              |
| PRDX1_RAT               | Peroxiredoxin-1                           | 175 | 2 | 1 | YES | 2,5          |
| ADO_RAT                 | Aldehyde oxidase                          | 457 | 3 | 1 | NO  |              |
| COMT_RAT                | Catechol O-methyltransferase              | 33  | 2 | 1 | NO  |              |
| GABT_RAT                | 4-aminobutyrate aminotransferase, mito.   | 41  | 2 | 1 | NO  |              |
| <b>Nuclear Proteins</b> |                                           |     |   |   |     |              |
| H2A1_RAT                | Histone H2A type 1                        | 42  | 3 | 1 | YES | 5,6,9        |
| H2A4_RAT                | Histone H2A type 4                        | 33  | 2 | 1 | NO  |              |
| H2B1_RAT                | Histone H2B type 1                        | 71  | 6 | 2 | YES | 5,6          |
| H2B1A_RAT               | Histone H2B type 1-A                      | 71  | 4 | 2 | NO  |              |
| H4_RAT                  | Histone H4                                | 211 | 4 | 2 | YES | 1,3,5,6,9,13 |
| NUCB2_RAT               | Nucleobindin-2 precursor                  | 129 | 3 | 1 | NO  |              |
| IMB1_RAT                | Importin beta-1 subunit                   | 45  | 1 | 1 | YES | 9            |
| <b>Miscellaneous</b>    |                                           |     |   |   |     |              |
| LRC46_RAT               | Leucine-rich repeat-containing protein 46 | 59  | 1 | 1 | NO  |              |
| RENBP_RAT               | N-acylglucosamine 2-epimerase             | 32  | 2 | 1 | NO  |              |

<sup>a</sup>Entry Name and Protein Name were described as annotated in Swiss-Prot database.

<sup>b</sup>Four independent preparations of exosomes secreted by primary culture of rat hepatocytes were separated by SDS-PAGE, cut out, in-gel digested and analyzed by tandem mass spectrometry. Mascot score and number of peptides (#pept.) for each of the proteins identified are detailed. The sequences of the peptides and the protein coverage are provided in Table S2, and for those proteins identified based on a single peptide the MS/MS spectrum is provided in Figure S1.

<sup>c</sup>Number of times that an identified protein appears among the four independent preparations analyzed.

<sup>d</sup>Identified proteins were compared to the exosome compositions reported for the following sources:

1.- Urine.

Pisitkun T, Shen R-F, Knepper MA (2004) Identification and proteomic profiling of exosomes in human urine. *Proceedings of the National Academy of Sciences* 101:13368-13373.

2.- Dendritic Cells.

Segura E, Nicco C, Lombard B, Veron P, Raposo G, Batteux F, Amigorena S, et al. (2005) ICAM-1 on exosomes from mature dendritic cells is critical for efficient naive T-cell priming. *Blood* 106:216-223.

3.- Dendritic Cells.

Thery C, Regnault A, Garin J, Wolfers J, Zitvogel L, Ricciardi-Castagnoli P, Raposo G, et al. (1999) Molecular characterization of dendritic cell-derived exosomes. Selective accumulation of the heat shock protein hsc73. *J Cell Biol* 147:599-610.

4.- Intestinal Epithelial cells.

Van Niel G, Malleghol J, Bevilacqua C, Candalh C, Brugiare S, Tomaskovic-Crook E, Heath JK, et al. (2003) Intestinal epithelial exosomes carry MHC class II/peptides able to inform the immune system in mice. *Gut* 52:1690-1697.

5.- Schwann-immortalized cells (Mov Cells).

Fevrier B, Vilette D, Archer F, Loew D, Faigle W, Vidal M, Laude H, et al. (2004) Cells release prions in association with exosomes. *Proc Natl Acad Sci U S A* 101:9683-9688.

6.- Microglial cell line N9

Potolichio I, Carven GJ, Xu X, Stipp C, Riese RJ, Stern LJ, Santambrogio L (2005) Proteomic analysis of microglia-derived exosomes: metabolic role of the aminopeptidase CD13 in neuropeptide catabolism. *J Immunol* 175:2237-2243.

7.- Human B-Cells.

Wubbolts R, Leckie RS, Veenhuizen PT, Schwarzmann G, Mobius W, Hoernschemeyer J, Slot JW, et al. (2003) Proteomic and biochemical analyses of human B cell-derived exosomes. Potential implications for their function and multivesicular body formation. *J Biol Chem* 278:10963-10972.

8.- Mast Cells.

- Skokos D, Le Panse S, Villa I, Rousselle JC, Peronet R, David B, Namane A, et al. (2001) Mast cell-dependent B and T lymphocyte activation is mediated by the secretion of immunologically active exosomes. *J Immunol* 166:868-876.
- 9.- Mast Cell line MC/9.  
Valadi H, Ekstrom K, Bossios A, Sjostrand M, Lee JJ, Lotvall JO (2007) Exosome-mediated transfer of mRNAs and microRNAs is a novel mechanism of genetic exchange between cells. *Nat Cell Biol* 9:654-659.
- 10.- Pleural fluid.  
Bard MP, Hegmans JP, Hemmes A, Luider TM, Willemsen R, Severijnen LA, van Meerbeeck JP, et al. (2004) Proteomic analysis of exosomes isolated from human malignant pleural effusions. *Am J Respir Cell Mol Biol* 31:114-121.
- 11.- Mesothelioma Cells.  
Hegmans JP, Bard MP, Hemmes A, Luider TM, Kleijmeer MJ, Prins JB, Zitvogel L, et al. (2004) Proteomic analysis of exosomes secreted by human mesothelioma cells. *Am J Pathol* 164:1807-1815.
- 12.- Ram Epididymal Fluid.  
Gatti JL, Metayer S, Belghazi M, Dacheux F, Dacheux JL (2005) Identification, proteomic profiling, and origin of ram epididymal fluid exosome-like vesicles. *Biol Reprod* 72:1452-1465.
- 13.- Adipocytes (3T3-L1 cells).  
Aoki N, Jin-no S, Nakagawa Y, Asai N, Arakawa E, Tamura N, Tamura T, et al. (2007) Identification and characterization of microvesicles secreted by 3T3-L1 adipocytes: redox- and hormone-dependent induction of milk fat globule-epidermal growth factor 8-associated microvesicles. *Endocrinology* 148:3850-3862.
- 14.- Synovial fibroblasts.  
Zhang HG, Liu C, Su K, Yu S, Zhang L, Zhang S, Wang J, et al. (2006) A membrane form of TNF-alpha presented by exosomes delays T cell activation-induced cell death. *J Immunol* 176:7385-7393.
- 15.- IMCD cells from rat kidneys.  
Barile M, Pisitkun T, Yu MJ, Chou CL, Verbalis MJ, Shen RF, Knepper MA (2005) Large scale protein identification in intracellular aquaporin-2 vesicles from renal inner medullary collecting duct. *Mol Cell Proteomics* 4:1095-1106.
