# Supplementary material
Source: PubMed Central journal article supplement (PMC2696236)
Supplement: NIHMS91193-supplement-2_si_002.pdf [file NIHMS91193-supplement-2_si_002.pdf]

**Table S2. Peptide Sequences and protein coverage obtained in the LC-MS/MS analysis of hepatocytes-derived exosomes.**

| <b>Entry Name</b> | <b>Peptide Sequences Matched</b>                                                                                                                                                                                                                               | <b>Coverage Sequence</b> | <b>Protein Size(aas.)</b> |
|-------------------|----------------------------------------------------------------------------------------------------------------------------------------------------------------------------------------------------------------------------------------------------------------|--------------------------|---------------------------|
| ALBU_RAT          | SEIAHR<br>LVQEVTDFAK<br>FPNAEFAEITK<br>APQVSTPTLVEAAR                                                                                                                                                                                                          | 7%                       | 608                       |
| APOA1_RAT         | MRVNADALR<br>WNEEVEAYR                                                                                                                                                                                                                                         | 6%                       | 259                       |
| APOA5_RAT         | VSTDGADNR<br>DSLDPQALSDEV<br>QLQQELEEVS                                                                                                                                                                                                                        | 9%                       | 367                       |
| APOE_RAT          | AQALSDR<br>AGAQEGAER<br>NRLGQYR<br>DRLEEV<br>EQMEEV<br>LGPLVEQGR<br>LEEVG<br>DRAQALSDR<br>LGADMEDLR<br>QWANLMEK<br>LQAEIFQAR<br>MEEQTQQIR<br>GRLEEVGNQAR<br>TANLGAGAAQPLR<br>SKMEEQTQQIR<br>GWFEP<br>ELEEQLGPVAEETR<br>NEVNTMLGQSTEELR<br>IQASVATNSIASTTVPLENQ | 54%                      | 312                       |
| PON3_RAT          | YVYVADV<br>IQDPLSDNPR                                                                                                                                                                                                                                          | 5%                       | 354                       |
| PON1_RAT          | LNAFR<br>ALCCYL<br>SFDPSKPGK<br>ILLMDLNEK<br>IQSILSEDPK<br>IFFYDSENPPGSEVLR                                                                                                                                                                                    | 15%                      | 355                       |
| RELN_RAT          | GEGLR<br>LSPLWYK                                                                                                                                                                                                                                               | 1%                       | 3462                      |

|           |                                                                                                                                                  |     |      |
|-----------|--------------------------------------------------------------------------------------------------------------------------------------------------|-----|------|
| FINC_RAT  | GGQPK<br>EKTGPMK<br>CTETGKSK<br>VGDTYERPK<br>HHAEHSAGRPR<br>GLAFTDVDVDSIK                                                                        | 2%  | 2477 |
| FIBB_RAT  | IRPVFPQQ<br>DNENVINEYSSILEDQK<br>NSIAELNSNINSVSETSSVTFQYLTLK                                                                                     | 11% | 479  |
| CO3_RAT   | EGIPDAR<br>CRNALK<br>AGQYTDK<br>DSCVGLTVVK<br>AGQYTDKGLR<br>ILKVVPEGMR<br>SGSDEVQAGQER                                                           | 3%  | 1663 |
| CO4_RAT   | GHMRIQQFR<br>DSSTWLTAFVLK                                                                                                                        | 1%  | 1737 |
| THRB_RAT  | YGFYTHVFR<br>ENLDRDIALLK<br>GDACEGDSGGPFVMK<br>TLSKYQNFDPVK<br>SPQELLCGASLISDR<br>RGDACEGDSGGPFVMK<br>KSPQELLCGASLISDR<br>ITDNMFCAGFKVNDTK       | 13% | 617  |
| HBA_RAT   | VDPVNFK<br>LRVDPVNFK<br>FLASVSTVLTSK                                                                                                             | 14% | 142  |
| HBB1_RAT  | LHVDPENFR<br>LLVVYPWTQR                                                                                                                          | 13% | 147  |
| ARTS1_RAT | DLINK<br>GFPLITITVR                                                                                                                              | 2%  | 930  |
| CLUS_RAT  | SGSGLVGR<br>MKGQCEK<br>EGALDDTR<br>FMDTVAEK<br>IDSLLESDR<br>SLLNSLEEAK<br>ASGIIDTLFQDR<br>VSTVTTHSSDSEVPSR<br>QQSQVLDAMQDSFTR<br>LTQQYNELLHSLQSK | 24% | 447  |
| PIGR_RAT  | SSVTFECDLGR<br>EIQNAGDQAQENR                                                                                                                     | 3%  | 769  |

|           |                                                                                                                          |     |      |
|-----------|--------------------------------------------------------------------------------------------------------------------------|-----|------|
| KNG1_RAT  | LDDLK<br>ATSQVVAGTK<br>VLDMTSVIR<br>KATSQVVAGTK<br>LISDFPEATSHK<br>FSIATQICNITPGK<br>SGNQFVLYQVTEGTK<br>SGNQFVLYQVTEGTKK | 10% | 639  |
| PDZD2_RAT | LVIGR<br>NGPRGSGR<br>NGDPRIR<br>LLPEQGANSR<br>GLSGPSKGLGTK<br>TSAGLGLSLDGGK<br>GLGFSIAGGRDCIR                            | 2%  | 2766 |
| TRFE_RAT  | TVLPADGPR<br>EGVCPEGSIDSAPVK                                                                                             | 3%  | 698  |
| DPP4_RAT  | AGAVNPTVK<br>VLEDNSALDK<br>WVSDSEYLYK<br>LGTLEVEDQIEAAR                                                                  | 6%  | 767  |
| CD81_RAT  | MGVEGCTKCIK<br>QFYDQALQQA VMDDDANNAK                                                                                     | 13% | 236  |
| CD82_RAT  | YIHSEDYSK<br>EEAWDYVQAQVK                                                                                                | 8%  | 266  |
| LAMP1_RAT | ALQASVGNSYK<br>GPDTV DSTTDIK                                                                                             | 6%  | 407  |
| LAMP2_RAT | TFQINTFNLK                                                                                                               | 2%  | 411  |
| HA12_RAT  | DYIALNEDLK<br>EGPEYWEQQTR                                                                                                | 6%  | 371  |
| 4F2_RAT   | VAEDEAEAGVK<br>IGDLQAFVGPPEAR                                                                                            | 5%  | 527  |
| SDC4_RAT  | ETEVIDPQDLLEGR                                                                                                           | 7%  | 202  |
| CSF1R_RAT | AVSLGQSK<br>NVL LTSGHVAK                                                                                                 | 2%  | 978  |
| FPRP_RAT  | SILALSHEGR<br>YIISLDQDSVVK                                                                                               | 2%  | 879  |
| PGRC1_RAT | DFTPAELR<br>YDGVQDPR<br>GDQPGASGDNDDEPPPLPR                                                                              | 18% | 195  |
| ABCBB_RAT | IAIAR<br>FSSSK<br>SLNIR<br>ILLLDEATSALDTESEK                                                                             | 2%  | 1321 |
| REEP6_RAT | NVATDALGALEAR                                                                                                            | 6%  | 211  |
| GRIA1_RAT | GLSVLQR<br>EEVIDFSKPFMSLGISIMIK                                                                                          | 3%  | 907  |

|           |                                                                                                                         |     |      |
|-----------|-------------------------------------------------------------------------------------------------------------------------|-----|------|
| GRIA4_RAT | HVKGYHYIIANLGFK<br>EEVIDFSKPFMSLGISIMIK                                                                                 | 4%  | 902  |
| MOT1_RAT  | SDANTDLIGGSPK                                                                                                           | 3%  | 494  |
| GTR1_RAT  | FLLINR<br>VTILELFR<br>TFDEIASGFR                                                                                        | 4%  | 492  |
| GTR2_RAT  | SFDEIAAEFR<br>VSVIQLFTDPNYR                                                                                             | 4%  | 522  |
| NTCP_RAT  | AAATEDATPAALEK                                                                                                          | 4%  | 362  |
| MRP9_RAT  | QVENISR<br>AVAEASVSLR                                                                                                   | 1%  | 1366 |
| AT1A1_RAT | AAEILAR<br>AAVPDAVGK<br>DMDELKK<br>GIVVYTGDR<br>LIIVEGCQR<br>IVEIPFNSTNK<br>LNIPVNQVNPR<br>NMVPQQALVIR<br>SPDFTNENPLETR | 10% | 1023 |
| AT1A2_RAT | GVGIISEGNETVEDIAAR<br>AAVPDAVGK<br>DHTEIVFAR<br>LIIVEGCQR<br>AGQENISVSKR<br>NMVPQQALVIR                                 | 7%  | 1020 |
| AT1A3_RAT | GVGIISEGNETVEDIAAR<br>RNPGGWVEK<br>DVAGDASESALLK<br>DGNALTPPPTTPEWVK                                                    | 3%  | 1013 |
| SO1A4_RAT | TDHAEMK<br>VATHGVRCFAK<br>GITKDFVFMK<br>EGLQENVDTENAK                                                                   | 6%  | 661  |
| SO1A3_RAT | SLGIGIHAF CIR<br>EGLQENVDTENAK                                                                                          | 3%  | 670  |
| BASI_RAT  | YTV DADDR<br>VLQEDTLPDLQMK                                                                                              | 5%  | 388  |
| XKR2_RAT  | YFGVK<br>LVENVIMVLVFK                                                                                                   | 3%  | 448  |
| ASGR1_RAT | WVCETELGK<br>WVDGTDYETGFK                                                                                               | 7%  | 284  |

|           |                                                                                                                                                                                                                                                                  |     |     |
|-----------|------------------------------------------------------------------------------------------------------------------------------------------------------------------------------------------------------------------------------------------------------------------|-----|-----|
| TBA2_RAT  | DVNAAIATIK<br>EIIDLVLDR<br>YMACCLLYR<br>QLFHPEQLITGK<br>LISQIVSSITASLR<br>SIQFVDWCPTGFK<br>AVFVDLEPTVIDEVR<br>NLDIERPTYTNLNR<br>IHFPLATYAPVISA EK<br>VGINYQPPTVVPGGDLAK<br>TIGGGDDSFNTFFSETGAGK<br>FDGALNVDLTEFQTNLVPYPR                                         | 38% | 451 |
| TBA3_RAT  | EDAANNYAR<br>EIVDLVLDRIR<br>NLDIERPTYTNLNR<br>VGINYQPPTVVPGGDLAK<br>TIGGGDDSFNTFFSETGAGK                                                                                                                                                                         | 16% | 450 |
| TBA6_RAT  | DVNAAIATIK<br>EIIDLVLDR<br>YMACCLLYR<br>QLFHPEQLITGK<br>LISQIVSSITASLR<br>TIQFVDWCPTGFK<br>AVFVDLEPTVIDEVR<br>NLDIERPTYTNLNR<br>IHFPLATYAPVISA EK<br>TIGGGDDSFNTFFSETGAGK<br>FDGALNVDLTEFQTNLVPYPR                                                               | 33% | 449 |
| TBB2A_RAT | YLTVA AIFR<br>IREEYPDR<br>FPGQLNADLR<br>LAVNMVPFPR<br>ISEQFTAMFR<br>INVYYNEAAGNK<br>EVDEQMLNVQNK<br>AILVDLEPGTMDSVR<br>NSSYFVEWIPNNVK<br>EIVHIQAGQCGNQIGAK<br>MSATFIGNSTAIQELFK<br>GHYTEGAELVDSVLDVVR<br>LTTPTYGDLNHLVSATMSGVTTCLR<br>SGPFGQIFRPDNFVFGQSGAGNNWAK | 40% | 445 |

|           |                                                                                                                                                                                                                                                                               |     |     |
|-----------|-------------------------------------------------------------------------------------------------------------------------------------------------------------------------------------------------------------------------------------------------------------------------------|-----|-----|
| TBB2C_RAT | YLTVAAVFR<br>IREEYPDR<br>FPGQLNADLR<br>LAVNMVPPFR<br>ISEQFTAMFR<br>INVYYNEATGGK<br>IMNTFSVVPSPK<br>EVDEQMLNVQNK<br>AVLVDLEPGTMDSVR<br>NSSYFVEWIPNNVK<br>EIVHLQAGQCGNQIGAK<br>MSATFIGNSTAIQELFK<br>GHYTEGAELVDSVLDVVR<br>SGPFGQIFRPDNFVFGQSGAGNNWAK                            | 43% | 445 |
| TBB3_RAT  | VAVCDIPPR<br>FPGQLNADLR<br>LAVNMVPPFR<br>ISEQFTAMFR<br>IMNTFSVVPSPK<br>AILVDLEPGTMDSVR<br>ALTVPELTQQMFDKAK<br>NSSYFVEWIPNNVK                                                                                                                                                  | 21% | 450 |
| TBB5_RAT  | YLTVAAVFR<br>IREEYPDR<br>FPGQLNADLR<br>LAVNMVPPFR<br>ISEQFTAMFR<br>ISVYYNEATGGK<br>IMNTFSVVPSPK<br>EVDEQMLNVQNK<br>AILVDLEPGTMDSVR<br>ALTVPELTQQVFDAK<br>NSSYFVEWIPNNVK<br>EIVHIQAGQCGNQIGAK<br>GHYTEGAELVDSVLDVVR<br>LTTPTYGDLNHLVSATMSGVTTCLR<br>SGPFGQIFRPDNFVFGQSGAGNNWAK | 47% | 444 |

|           |                                                                                                                                                                                                      |     |      |
|-----------|------------------------------------------------------------------------------------------------------------------------------------------------------------------------------------------------------|-----|------|
| ACTB_RAT  | LDLAGR<br>GILTLK<br>IIAPPER<br>AGFAGDDAPR<br>DLTDYLMK<br>GYSFTTTAER<br>EITALAPSTMK<br>HQGVMVGMGQK<br>DSYVGDEAQSK<br>QEYDESGPSIVHR<br>SYELPDGQVITIGNER<br>VAPEEHPVLLTEAPLNPK<br>DLYANTVLSGGTTMYPGIADR | 39% | 375  |
| ARP2_RAT  | LDIAGR<br>LNIDTRSCK<br>DLMVGDEASELR                                                                                                                                                                  | 7%  | 394  |
| ACTN1_RAT | ISNVNK<br>YLDIPK<br>EALERTEK<br>TINEVENQILTR<br>FAIQDISVEETSAK                                                                                                                                       | 5%  | 892  |
| ADIP_RAT  | EQLEASRR<br>LAKSLPTSPSDFCPSR                                                                                                                                                                         | 3%  | 613  |
| MYH9_RAT  | VVFQEFR<br>VISGVLQLGNIVFK<br>QLLQANPILEAFGNAK<br>IIGLDQVAGMSETALPGAFK<br>ELETQISELQEDLESER<br>KLEGDSTDLSQIAELQAQIAELK                                                                                | 5%  | 1961 |
| MYH11_RAT | AGGRR<br>EEAIK<br>KAFTK<br>QADLEK<br>EKQAATK<br>KLQAQMK<br>NTDQASMPDNTAAQK<br>QLLQANPILEAFGNAK                                                                                                       | 5%  | 1327 |
| MOES_RAT  | VSQLEMAR<br>QLFDQVVK<br>ALTSELANAR<br>TTEAEKNER<br>EDAVLEYLK<br>IGFPWSEIR<br>AQMVEDLEK<br>AQQELEEQTR                                                                                                 | 13% | 577  |

|           |                                                                                                 |    |      |
|-----------|-------------------------------------------------------------------------------------------------|----|------|
| EZRI_RAT  | KVSAQEV<br>EKEQMLR<br>QLFDQVVK<br>IGFPWSEIR<br>QRIDEFEAM                                        | 7% | 586  |
| COF1_RAT  | YALYDATYETK                                                                                     | 7% | 166  |
| DYHC_RAT  | ILDDDTIITLENLKR                                                                                 | 1% | 4644 |
| MAP1B_RAT | KDKPGK<br>KEEKPK<br>LMITDAAR<br>MYVLNPVKSSK<br>QDVDLCLVSSCEFK                                   | 2% | 2459 |
| CLAP2_RAT | AGGTSK<br>SVPVR<br>GIHDADAEAR<br>NGSIPTYMR<br>LSTPLVAVGNAK<br>SSGSVASLPQSDR<br>EGLLGLQNLLKNQR   | 5% | 1286 |
| KIF1B_RAT | QSGTAK<br>EGANINK<br>VGQADAER<br>CPSQPKY<br>ISPPRSLR<br>EDGGTLGVFSPK<br>VTGIYELSLCK             | 3% | 1816 |
| KLC3_RAT  | VLGADHPDVAK<br>LAQENTWLR                                                                        | 4% | 505  |
| TSC2_RAT  | YTEFLTGLGRLELK                                                                                  | 1% | 1809 |
| SPTN2_RAT | VYTPR<br>ELGLTK<br>FSFFK<br>ASPPGKDR<br>LTALEER<br>ALEEEIR<br>TLGEEVTR<br>IKALADER<br>VGDLYSDLR | 6% | 2388 |
| ROCK2_RAT | NGVEEIK<br>ENDAIQTR<br>DSDIEQLR<br>CLMQNDLK<br>GAFGEVQLVR<br>NLICAFLTDR<br>MNLEKQNAELR          | 4% | 1379 |



|           |                                                                                          |     |     |
|-----------|------------------------------------------------------------------------------------------|-----|-----|
| RAI14_RAT | LLQYK<br>VASLLGK<br>TMAKEMEEK<br>EKAHSEVAQVR                                             | 3%  | 978 |
| RHOA_RAT  | QVELALWDTAGQEDYDR                                                                        | 8%  | 193 |
| RAB1A_RAT | MGPGATAGGAEK<br>LLLIGDSGVGK<br>QWLQEIDR<br>LQIWDTAGQER                                   | 20% | 205 |
| RAB1B_RAT | LLLIGDSGVGK<br>QWLQEIDR<br>LQIWDTAGQER<br>MGPGAASGGERPNLK                                | 22% | 201 |
| RAB2A_RAT | IQEGVFDINNEANGIK                                                                         | 7%  | 212 |
| RAB3A_RAT | MASATDSR<br>LQIWDTAGQER                                                                  | 9%  | 220 |
| RAB7_RAT  | ATIGADFLTK<br>NNIPYFETSAK<br>DPENFPFVVLGNK                                               | 16% | 207 |
| RB11A_RAT | VVLIGDSGVGK<br>HLTYENVER<br>AQIWDTAGQER                                                  | 14% | 216 |
| RAB12_RAT | IGSRGVGK<br>LQIWDTAGQER                                                                  | 10% | 197 |
| RAB13_RAT | TVEIEGK<br>LLLIGDSGVGK                                                                   | 9%  | 203 |
| RAB14_RAT | AVTRSYR<br>LTSEPQQR<br>LQIWDTAGQER                                                       | 13% | 215 |
| RAB35_RAT | KDNLAK<br>LLIIGDSGVGK<br>LQIWDTAGQER                                                     | 13% | 201 |
| RAB43_RAT | LQIWDTAGQER                                                                              | 5%  | 210 |
| RAP1B_RAT | EQGQNLAR<br>LVVLGSGGVGK<br>YDPTIEDSYR<br>YDPTIEDSYRK<br>DTDDVPMILVGNK<br>VKDTDDVPMILVGNK | 24% | 184 |
| RP3A_RAT  | ASEAR<br>TQIKK<br>LETMR<br>IGRLVDR<br>IGDIEER<br>NFNICLER                                | 5%  | 684 |
| RAB3D_RAT | ASASEPPASPR<br>LQIWDTAGQER                                                               | 10% | 219 |

|           |                                                                                                         |     |      |
|-----------|---------------------------------------------------------------------------------------------------------|-----|------|
| ARF1_RAT  | MLAEDEL<br>GNIFANLFK<br>NISFTVWDVGGQDK<br>QDLPNAMNAAEITDK                                               | 25% | 181  |
| ARF3_RAT  | GNIFGNLLK<br>MLAEDEL<br>NISFTVWDVGGQDK<br>QDLPNAMNAAEITDK                                               | 25% | 181  |
| RASN_RAT  | SFADINLYR<br>QGVEDAFYTLVR                                                                               | 11% | 189  |
| RASH_RAT  | TVESRQAQDLAR<br>QGVEDAFYTLVR                                                                            | 12% | 189  |
| GBLP_RAT  | QEVISTSSK<br>VWNLANCKLK<br>DETNYGIPQR<br>LWDLTTGTTTR<br>TEQMTLRGTLK<br>DVLSVAFSSDNR<br>IIVDELKQEVISTSSK | 22% | 317  |
| GBB4_RAT  | LLVSASQDGK<br>LIIWDSYTTNK                                                                               | 6%  | 340  |
| GBB2_RAT  | LLVSASQDGK<br>TFVSGACDASIK<br>LIIWDSYTTNK                                                               | 9%  | 340  |
| GNAS1_RAT | AAAAR<br>DIIQR<br>DEFLR<br>KEAMEMR<br>LLLLGAGESGK                                                       | 3%  | 1144 |
| GNAI2_RAT | AAREVK<br>LLLLGAGESGK<br>AVVYSNTIQSIMAIVK<br>IAQSDYIPTQQDVLR                                            | 13% | 355  |
| GNA12_RAT | ILLGAGESGK<br>GIVEHDFVIK<br>GIVEHDFVIKK                                                                 | 8%  | 379  |
| GNAO1_RAT | LLLLGAGESGK                                                                                             | 3%  | 354  |
| 1433B_RAT | LAEQAER<br>NLLSVAYK<br>YLSEVASGDN<br>DSTLIMQLLR<br>MTMDKSELVQK<br>AVTEQGHELSNEER                        | 24% | 246  |

|           |                                                                                                                      |     |      |
|-----------|----------------------------------------------------------------------------------------------------------------------|-----|------|
| 1433E_RAT | LAEQAER<br>NLLSVAYK<br>DSTLIMQLLR<br>EAAENSLVAYK<br>YLAEFATGNDR                                                      | 18% | 255  |
| 1433G_RAT | LAEQAER<br>NLLSVAYK<br>TSADGNEKK<br>EQLVQKAR<br>YLAEVATGEK<br>DSTLIMQLLR<br>NVTELNEPLSNEER                           | 27% | 247  |
| 1433Z_RAT | LAEQAER<br>VVSSIEQK<br>NLLSVAYK<br>YLAEVAAGDDK<br>DSTLIMQLLR<br>YLAEVAAGDDKK<br>SVTEQGAELSNEER<br>GIVDQSQQAYQEAFEISK | 31% | 245  |
| IL6RB_RAT | GPTVR<br>GSLLESK<br>TSVGKEMVVR                                                                                       | 2%  | 918  |
| ILK_RAT   | LLQYK<br>ELLRER<br>GTTRTRPR<br>DFNEECPR<br>YGEMPVDKAK<br>FDMIVPILEK                                                  | 10% | 452  |
| KCC2A_RAT | DLINK<br>MATITCTR<br>QETVDCLKK                                                                                       | 5%  | 478  |
| AAKB2_RAT | IPLIK<br>AEGGGHGPGK                                                                                                  | 5%  | 271  |
| AKAP6_RAT | QEKEGTSAEK<br>LYLETHLSFK<br>DLLSPESGSLVR                                                                             | 1%  | 2314 |
| SND1_RAT  | TDAVDSVVR<br>VADISGDTQK<br>QFLPFLQR<br>FVDGEWYR<br>LGALPPAFSTR<br>SDISSHPPVEGAYAPR                                   | 9%  | 909  |
| RGN_RAT   | NLPGLVQEGEPFSEEATLFTK<br>QSGGYVATIGTK<br>VGVDAPVSSVALR<br>YFAGTMAEETAPAVLER                                          | 14% | 299  |

|           |                                                                                                                                                                                                                                                                                                                                                                                                  |     |      |
|-----------|--------------------------------------------------------------------------------------------------------------------------------------------------------------------------------------------------------------------------------------------------------------------------------------------------------------------------------------------------------------------------------------------------|-----|------|
| MVP_RAT   | VLFAPVR<br>TRDALQR<br>ALLDFEDK<br>AQLELEVSK<br>EMELIYAR<br>GPLEYVPSAK<br>SFFLQPGER<br>VTGEEWLVR<br>IEGEGSVLQAK<br>GTAKPLQPSAPR<br>DLAVAGPEMQVK<br>HYCIVANPVS<br>GAVASVTFDDFHK<br>VSHQAGDCWLIR<br>LFSVPDFVGDACK<br>ALQPLEEGESEEK<br>AQALAIETEAELER<br>EVEVVEIIQATVIK<br>DTQSSVLFDITGQVR<br>LAQDPFPLYPGEVLEK<br>DITPLQVVLNPTALHLK<br>GIQDVYVLSEQQGLLLK<br>QAIPLDQNEGIYVQDVK<br>ELPSGVEELNLGHDPLADR | 34% | 861  |
| PHB2_RAT  | DLAGR<br>FNASQLITQR<br>IVQAEGEAEAAK                                                                                                                                                                                                                                                                                                                                                              | 9%  | 299  |
| IRS1_RAT  | VSLPR<br>ASTLPRVR<br>KVDTAAQTNSR                                                                                                                                                                                                                                                                                                                                                                 | 2%  | 1235 |
| CALM_RAT  | DTDSEEEIR<br>EAFSLFDKDGDTITTK                                                                                                                                                                                                                                                                                                                                                                    | 17% | 149  |
| MFGM_RAT  | AEYLK<br>VAYSLDGR<br>VTGIITQGAR<br>VSGVMTQGASR<br>INAWTAQSNSAK<br>EWLQVDLGTQK<br>VFQGNLDNNSHK<br>EFMGNQDNNSLK<br>INMFNPTLEAQYIR                                                                                                                                                                                                                                                                  | 22% | 427  |
| ANXA2_RAT | DALNIETAIK<br>QDIAFAYQR<br>TPAQYDASELK<br>TNQELQEINR<br>QDIAFAYQRR<br>GVDEVTIVNILTNR                                                                                                                                                                                                                                                                                                             | 16% | 339  |

|           |                                                                                                                                              |     |     |
|-----------|----------------------------------------------------------------------------------------------------------------------------------------------|-----|-----|
| ANXA4_RAT | ETKGGTVK<br>GLGTDDSTLIR<br>FLSILCSRNR<br>QDAQDLYEAGEK<br>AEIDMLDIPANFK                                                                       | 17% | 319 |
| ANXA5_RAT | TPEELR<br>GDTSGDYKK<br>VLTEIIASR<br>SELTGKFEK<br>LIVALMKPSR<br>GAGTDDHTLIR                                                                   | 17% | 319 |
| ANXA6_RAT | SEISGDLAR<br>AMEGAGTDEK<br>SEIDLLNIR<br>STPEYFAER<br>SELDMLDIR<br>QTFKSHFGR<br>SNVQRQQIR<br>TTGKPIEASIR<br>TNEQIHQLVAAYK<br>GIGTDEATIIDIITQR | 15% | 673 |

|         |                                                                                                                                                                                                                                                                                                                                                                                                                                                                                                                                                                                                                                                                                                                                                                                                                                                                        |     |      |
|---------|------------------------------------------------------------------------------------------------------------------------------------------------------------------------------------------------------------------------------------------------------------------------------------------------------------------------------------------------------------------------------------------------------------------------------------------------------------------------------------------------------------------------------------------------------------------------------------------------------------------------------------------------------------------------------------------------------------------------------------------------------------------------------------------------------------------------------------------------------------------------|-----|------|
| CLH_RAT | AYEFAER<br>RIAAYLFK<br>YIEIYVQK<br>AHIAQLCEK<br>HDVVFLITK<br>VANVELYYK<br>LLLPWLEAR<br>DAMQYASESK<br>EVCFACVDGK<br>EHLELFSWR<br>QLPLVKPYLR<br>VDKLDASESLR<br>TLQIFNIEMK<br>LLYNNVSNFGR<br>NNLAGEELFAR<br>LEKHELIEFR<br>IYIDSNNNPER<br>VVGAMQLYSVDR<br>NLQNLLILTAIK<br>CNEPAVWAQLAK<br>IVLDNSVFSEHR<br>SVDPTLALSVYLR<br>ALEHFTDLYDIK<br>VGYTPDWIFLLR<br>WLLLTGISAQQNR<br>GQFSTDELVAEVEK<br>LTDQLPLIIVCDR<br>RPISADSAIMNPASK<br>ESYVETELIFALAK<br>ALEHFTDLYDIKR<br>GQFSTDELVAEVEKR<br>VSQPIEGHAASFAQFK<br>KFNALFAQGNYSEAAK<br>TSIDAYDNFDNISLAQR<br>LHIIEVGTPTGNQPFK<br>AFMTADLPNELIELLEK<br>LASTLVHLGEYQAAVDGAR<br>KDPELWGSVLLESNPYR<br>LPVVIGGLLDVDCSESVIK<br>GQCDLELINVCNENSLFK<br>FDVNTSAVQVLIHIGNLDR<br>ISGETIFVTAPHEATAGIIGVNR<br>SVNESLNNLFITEEDYQALR<br>KFDVNTSAVQVLIHIGNLDR<br>LAELEEFGPNNAHIQQVGDR<br>RPLIDQVVQTALSETQDPEEVSVTVK<br>LLEMNLMHAPQVADAILGNQMFTHYDR | 38% | 1675 |
|---------|------------------------------------------------------------------------------------------------------------------------------------------------------------------------------------------------------------------------------------------------------------------------------------------------------------------------------------------------------------------------------------------------------------------------------------------------------------------------------------------------------------------------------------------------------------------------------------------------------------------------------------------------------------------------------------------------------------------------------------------------------------------------------------------------------------------------------------------------------------------------|-----|------|

FQSVPAQPGQTSPLLQYFGILLDQGQLNK

|           |                                                           |     |     |
|-----------|-----------------------------------------------------------|-----|-----|
| CLCA_RAT  | ELEEWYAR<br>WREEQTER                                      | 6%  | 248 |
| COPB_RAT  | VLSTPDLEVR<br>VLQDLVMDILR                                 | 2%  | 953 |
| COPB2_RAT | LPEAAFLAR<br>VWCVASLR<br>VFNYNTLER<br>AAESLADPTEYENLFPGLK | 4%  | 905 |
| YIPF5_RAT | TLTVLHPLR                                                 | 3%  | 257 |
| TMEDA_RAT | LKPLEVELR<br>IPDQLVILDMK<br>ITDSAGHILYAK                  | 15% | 219 |
| TMED2_RAT | LEEMINELAVAMTAVK                                          | 7%  | 201 |
| SCAM1_RAT | KAAELDR<br>QEELERK                                        | 4%  | 338 |
| LMAN1_RAT | QLDMILDEQR<br>YVSSLTEEISR                                 | 4%  | 517 |

|           |                                                                                  |     |     |
|-----------|----------------------------------------------------------------------------------|-----|-----|
| FLOT1_RAT | DAGIR<br>IGEAQAK<br>IGEAQAKR<br>QKFSEQVFK<br>VTGEVLDILSR                         | 8%  | 428 |
| FLOT2_RAT | DAGIR<br>IPLIK<br>DVYDK<br>SAFSEEVNIK<br>QVLLAQAEAEK                             | 8%  | 428 |
| PDC6I_RAT | AEGAK<br>EGLNDLK<br>FYNELTEILVR                                                  | 6%  | 401 |
| VP33B_RAT | AFPHR<br>IIEQVLDLR                                                               | 2%  | 617 |
| CEAM1_RAT | IDPIKR<br>VTTTGLNSEIAR<br>QFNPIQTSVQFR                                           | 6%  | 519 |
| TMM27_RAT | AALGDK<br>AMVAFSMR                                                               | 6%  | 222 |
| MPRD_RAT  | AVVMISCNR<br>GVGDDQLGEESEER                                                      | 8%  | 278 |
| SSRG_RAT  | QQSEEDLLLQDFSR                                                                   | 7%  | 185 |
| TERA_RAT  | ACKLAIR<br>VVRNNLR<br>LAGESESNLR<br>GILLYGPPGTGK<br>EVDIGIPDATGR<br>WALSQSNPSALR | 7%  | 806 |
| GRAP1_RAT | ESSAIPAR<br>NGVELSSLR<br>ETLFNDSR<br>MQTQLELR<br>ELRELHEDK                       | 5%  | 837 |
| RSSA_RAT  | LLVVTDP<br>FAAATGATPIAGR<br>AIVAIENPADVSVISSR                                    | 12% | 295 |
| RS3_RAT   | ACYGVLR<br>AELNEFLTR<br>TQNVLGKGR<br>GCEVVVSGKLR<br>ELAEDGYSGVEVR                | 26% | 243 |
| RS4X_RAT  | DEILPTTPISEQK<br>VAAPK<br>MARGPK<br>TDITYPAGFMDVISIDK                            | 10% | 263 |



|           |                                  |     |      |
|-----------|----------------------------------|-----|------|
| RS6_RAT   | DIPGLTDTTVPR                     | 10% | 249  |
|           | MKLNISFPATGCQK                   |     |      |
| RLA2_RAT  | NIEDVIAQGVGK                     | 50% | 115  |
|           | ILDSVGIEADDER                    |     |      |
|           | LASVPAGGAVAVSAAPGSAAPAAGSAPAAAEE |     |      |
|           | K                                |     |      |
| RL4_RAT   | NIPGITLLNVSK                     | 3%  | 421  |
| RL6_RAT   | KSSSK                            | 14% | 298  |
|           | KYSAAK                           |     |      |
|           | AVPQLQGYLR                       |     |      |
|           | EKYEITEQR                        |     |      |
|           | AVDSQILPKIK                      |     |      |
| RL7_RAT   | LNKASVNMLR                       | 8%  | 260  |
|           | IALTDNSLVAR                      |     |      |
| RL7A_RAT  | GALAK                            | 9%  | 266  |
|           | AILYKR                           |     |      |
|           | AGVNTVTTLVENK                    |     |      |
| RL11_RAT  | AQDQGEK                          | 19% | 178  |
|           | LCLNICVGESGDR                    |     |      |
|           | VLEQLTGQTPVFSK                   |     |      |
| EF1A1_RAT | AERER                            | 13% | 462  |
|           | LPLQDVYK                         |     |      |
|           | IGGIGTVPVGR                      |     |      |
|           | STTTGHLIYK                       |     |      |
|           | VETGVLKPGMVVTFAPVNVTTTEVK        |     |      |
| EF1A2_RAT | AERER                            | 9%  | 463  |
|           | GNVCGDSK                         |     |      |
|           | LPLQDVYK                         |     |      |
|           | IGGIGTVPVGR                      |     |      |
|           | STTTGHLIYK                       |     |      |
| EF2_RAT   | FSVSPVVR                         | 13% | 858  |
|           | GGGQIPTAR                        |     |      |
|           | VNFTVDQIR                        |     |      |
|           | VFSGVVSTGLK                      |     |      |
|           | STLTDSLVCCK                      |     |      |
|           | VFDAIMNFR                        |     |      |
|           | TFCQLILDPIFK                     |     |      |
|           | IWCFGPDGTGPNILTDITK              |     |      |
|           | RWLPAGDALLQMITIHLPSVTAQK         |     |      |
| SYPM_RAT  | ASDLTCKSQR                       | 5%  | 475  |
|           | LVRVIDQEMQAIGGQK                 |     |      |
| SYV_RAT   | LSATVTEAFVR                      | 2%  | 1264 |
|           | LLSPFMPFVTEELFQR                 |     |      |
| SYTC_RAT  | NELSGALTGLTR                     | 4%  | 695  |
|           | VVWDLDRPLETDCTLELLK              |     |      |
| MA2A1_RAT | LLAENNEIISNIR                    | 2%  | 489  |
| RIB1_RAT  | AVTSEIAVLQSR                     | 2%  | 605  |

|           |                    |     |     |
|-----------|--------------------|-----|-----|
| RIB2_RAT  | TGQEVVFVAEPDNK     | 2%  | 631 |
| GLCNE_RAT | VAIVSMK            | 6%  | 722 |
|           | ETGENVLHVR         |     |     |
|           | TLVLFPNIDAGSK      |     |     |
|           | EVGAFGTPVINLGTR    |     |     |
| HS70L_RAT | SAVGDEGLK          | 16% | 641 |
|           | DAGVIAGLNVL        |     |     |
|           | VEIANDQGNR         |     |     |
|           | NALESYAFNMK        |     |     |
|           | TTPSYVAFTDTER      |     |     |
|           | AFYPEEISSMVLTK     |     |     |
|           | IINEPTAAAIAYGLDK   |     |     |
|           | ATAGDTHLGGEDFDNR   |     |     |
| HSP71_RAT | REELER             | 16% | 641 |
|           | LLQDFFNQR          |     |     |
|           | YKAEDEVQR          |     |     |
|           | DAGVIAGLNVL        |     |     |
|           | VEIANDQGNR         |     |     |
|           | NALESYAFNMK        |     |     |
|           | TTPSYVAFTDTER      |     |     |
|           | NQVALNPQNTVFDK     |     |     |
|           | ATAGDTHLGGEDFDNR   |     |     |
| TRAP1_RAT | GVVDSEDIPLNLSR     | 2%  | 706 |
| HSP7C_RAT | DISENKR            | 23% | 646 |
|           | INDEDKQK           |     |     |
|           | DAGTIAGLNVL        |     |     |
|           | ATVEDEKLQK         |     |     |
|           | VEIANDQGNR         |     |     |
|           | FDDAVVQSDMK        |     |     |
|           | NSLESYAFNMK        |     |     |
|           | TTPSYVAFTDTER      |     |     |
|           | IINEPTAAAIAYGLDK   |     |     |
|           | NQVAMNPTNTVFDK     |     |     |
|           | STAGDTHLGGEDFDNR   |     |     |
|           | IINEPTAAAIAYGLDKK  |     |     |
|           | TVTNAVVTVPAYFNDSQR |     |     |

|           |                                                                                                                                                                                                                                                                          |     |     |
|-----------|--------------------------------------------------------------------------------------------------------------------------------------------------------------------------------------------------------------------------------------------------------------------------|-----|-----|
| GRP78_RAT | LTPEEIER<br>ALSSQHQAR<br>ITITNDQNR<br>VYEGERPLTK<br>VEIANDQGNR<br>DAGTIAGLNVMR<br>NELESYAYSLK<br>ELEEIVQPIISK<br>TWNDPSVQQDIK<br>TFAPEEISAMVLTK<br>ITPSYVAFTPEGER<br>IINEPTAAAIA YGLDK<br>NQLTSNPENTVFDK<br>IINEPTAAAIA YGLDKR<br>SQIFSTASDNQPTVTIK<br>VTHAVVTVPAYFNDAQR | 28% | 654 |
| HS90A_RAT | LSELLR<br>TLVSVTK<br>YESLTDPSK<br>YIDQEELNK<br>ELISNSSDALDK<br>EDQTEYLEER<br>TLTIVDTGIGMTK<br>EGLELPEDEEEK<br>GVVDSIDLPLNISR                                                                                                                                             | 13% | 733 |
| HS90B_RAT | LSELLR<br>ADHGPIGR<br>YESLTDPSK<br>VEKVTISNR<br>YIDQEELNK<br>EQVANSFAFVER<br>ELISNASDALDK<br>EDQTEYLEER<br>TLTLVDTGIGMTK<br>EGLELPEDEEEK<br>GVVDSIDLPLNISR                                                                                                               | 16% | 724 |
| TCPA_RAT  | SLHDALCVVK<br>EQLAIAEFAR<br>FATEAAITILR<br>VLCELADLQDK<br>YINENLIINTDELGR<br>EVGDGTTSVVIAAELLK<br>SLLVIPNTLAVNAAQDSTDLVAK<br>SVVPGGAVEAALSIIYLENYATSMGSR                                                                                                                 | 22% | 556 |

|           |                                                                                                                                                                                                    |     |     |
|-----------|----------------------------------------------------------------------------------------------------------------------------------------------------------------------------------------------------|-----|-----|
| TCPB_RAT  | GATQQILDEAER<br>GSGNLEAIHVIKK<br>QVLLSAAEAAEVILR<br>LGGSLADSYLDEGFLLDKK<br>VQDDEVGDGTTSVTVLAAELLR                                                                                                  | 15% | 535 |
| TCPD_RAT  | VIDPATATSVDLR<br>DALSDLALHFLNK                                                                                                                                                                     | 4%  | 539 |
| TCPE_RAT  | LMGLEALK<br>IADGYEQAAR<br>EKFEEMIAQIK<br>ESNPALGIDCLHK<br>WVGGPEIELIAIATGGR                                                                                                                        | 10% | 541 |
| TCPG_RAT  | ISTPVDVNNR<br>AVAQALEVIPR<br>TAVETAALLR<br>ELGIWEPLAVK<br>IVLLDSSLEYK<br>TLIQNCGASTIR                                                                                                              | 12% | 545 |
| CALX_RAT  | GLVLMSR<br>EIEDPEDR<br>APVPTGEVYFADSFDR                                                                                                                                                            | 5%  | 591 |
| PDIA1_RAT | VLVGK<br>QLAPIWDK<br>DHENIVIAK<br>NFEEVAFDEK<br>MDSTANEVEAVK<br>ALLCLALAWAAR<br>YKPESDELTAEK<br>VDATEESDLAQQYGVR                                                                                   | 16% | 509 |
| PDIA3_RAT | DPNIVIAK<br>TFLDAGHK<br>TADGIVSHLK<br>YGVSGYPTLK<br>NTKGSNYWR<br>FVMQEEFSR<br>LAPEYEEAATR<br>FAHTNVEESLVK<br>SEPIPETNEGPVK<br>ELNDFISYLQR<br>EATNPPIIQEEKPK<br>MDATANDVPSPYEVK<br>VVVAESFDDIVNAEDK | 29% | 505 |

|           |                                                                                   |     |      |
|-----------|-----------------------------------------------------------------------------------|-----|------|
| PDIA4_RAT | DYVVK<br>TFDAIVMDPK<br>VDATEQTDLAK<br>IDATSASMLASK<br>RFDVSGYPTLK<br>MDATANDITNDR | 9%  | 643  |
| PDIA6_RAT | SGGYSSGKQGR<br>GESPVYDGGGR<br>DVVELTDDTFDK<br>NLEPEWAAAATEVK<br>GSTAPVGGGSFPNITPR | 14% | 440  |
| CALR_RAT  | AAEKQMK<br>GLQTSQDAR<br>EQFLDGDAWTNR<br>IKDPDAAKPEDWDER                           | 10% | 416  |
| PPIB_RAT  | VLEGMDVVR<br>TVDNFVALATGEK<br>DTNGSQFFITTVK                                       | 17% | 208  |
| AMPN_RAT  | EDNSATGFGSGTR<br>VVATTQMQAADAR<br>ESALVFDQPSSSISNK<br>ALGDTPAPNIDTTELV            | 6%  | 965  |
| MEP1A_RAT | LVSPR<br>TRNALR<br>DLTHLR<br>GAILNAFEMFR                                          | 4%  | 748  |
| ZPI_RAT   | GLMNHYINK<br>AVKVPMMYR                                                            | 4%  | 436  |
| PSB4_RAT  | MEAFWESR<br>QPVLSQTEAR                                                            | 7%  | 263  |
| PRS6A_RAT | QTYFLPVIGLVDAEK                                                                   | 3%  | 439  |
| UBIQ_RAT  | TLTGK<br>ESTLHLVLR<br>TLSDYNIQK<br>TITLEVEPSDTIENVK                               | 51% | 76   |
| RN190_RAT | RRPNLGR<br>TSVTEPTTK                                                              | 2%  | 790  |
| CAND1_RAT | LTLIDPETLLPR<br>DLLDSVLPFLYNETK                                                   | 2%  | 1230 |

|          |                                                                                                                                                                                                                                                                                                                                                                                                                                                                                                                                     |     |      |
|----------|-------------------------------------------------------------------------------------------------------------------------------------------------------------------------------------------------------------------------------------------------------------------------------------------------------------------------------------------------------------------------------------------------------------------------------------------------------------------------------------------------------------------------------------|-----|------|
| ACLY_RAT | LLVGVDEK<br>EILIPVFK<br>GGPNYQEGLR<br>DGVYILDAAK<br>LGLVGVNLSLDGVK<br>WGDIEFPPPFGR<br>SGGMSNELNNIISR<br>IGNTGGMLDNILASK<br>TIAIIAEGIPEALTR<br>AFDSGIIPMEFVNK<br>DLVSSLTSGLLTIGDR<br>EAYPEEAZIADLDAK<br>GVTIIGPATVGGIKPGCFK<br>SAYDSTMETMNYAQIR<br>QHFPATPLLDYALEVEK                                                                                                                                                                                                                                                                 | 19% | 1100 |
| FAS_RAT  | FLEIGK<br>LTQGEVYK<br>AVAHILGIR<br>TGTVPLEVR<br>VLEALLPLK<br>VAAAVDLITR<br>VFTTVGSAEK<br>QVQPEGPYR<br>EAVLAAYWR<br>EHDLVLP<br>AVAHGDGEAQR<br>AEAVVAVLLTK<br>QQEQLVPTLEK<br>SFYGTALFLCR<br>GVDLVLNSLAEEK<br>DNLEFFLTNLGK<br>TMEAVQGLLEQGR<br>GVKPSCTIPLMK<br>RQQEQLVPTLEK<br>FPQLDDTSFANSR<br>ACIDTALENLSTLK<br>LGPVGGVFNLAMVLR<br>VTAIYIDPATHLQK<br>CILLSNLSSTSHVPK<br>VLFPGTGYYLYLVWK<br>DTSFEQHVVLLHTGGK<br>SYIITGGLGGFGLRLAR<br>MTVPGLEDLPQHGLPR<br>DHKDNLEFFLTNLGK<br>GNAGQSNYGFANSTMER<br>GLESIIIIHSSLAEP<br>WLSTSIPEAQWQSSLAR | 26% | 2505 |

LFDHPEVPIPAESESVSR  
 LLLPEDPLISGLLNSQALK  
 LTPGCEAEAEAEICFFIK  
 EEEPEAMLPGAQPTLISAISK  
 DAMLENQTPELFDVFNKPK  
 FVFTPHVEPECLSESAILQK  
 TGGLAFHSYFMEGIAPDLLQALK  
 SLYQPGGVAPESLEYIEAHGTGTK  
 VHLTGIDINPNALFPPVEFPVPR  
 LSPQDKPIFLPVEDTSFQWVDSLK  
 SLSLSLEETPVVFENVTFHQATILPR  
 LPESENLQEFWANLIGGVDMVTDDDRR  
 LSVPTYGLQCTQAAPLDSIPNLAAYYIDCIK

|           |                                                                                                                |     |     |
|-----------|----------------------------------------------------------------------------------------------------------------|-----|-----|
| FABPL_RAT | LTITYGSK<br>YQVQSQENFEPFMK                                                                                     | 17% | 127 |
| ACADL_RAT | KLTDIGIR<br>QLLGINIAEK<br>AQDTAELFFEDVR                                                                        | 7%  | 430 |
| ACSL1_RAT | CGVEIIGLK<br>LLEGVENK<br>IGFFQGDIR<br>LAQGEYIAPEK<br>NAGLKPFEQVK<br>SQIDELYSTIK<br>GFQGSFEELCR<br>VLQPTIFPVVPR | 12% | 699 |

|           |                                                                                                                                |     |      |
|-----------|--------------------------------------------------------------------------------------------------------------------------------|-----|------|
| ACSL5_RAT | EGGLK<br>RNSLWDK<br>IGFFQGDIR<br>ATMLIENVEK<br>LAQGEYIAPEK<br>AEYLGSCLLHK                                                      | 8%  | 683  |
| ACSL6_RAT | ALRPTIFPVVPR                                                                                                                   | 1%  | 697  |
| ECHP_RAT  | VVGVPVALDLITSGK<br>VGLPEVTLGILPGAR                                                                                             | 4%  | 722  |
| ACOX2_RAT | EAFDLLPLIR                                                                                                                     | 1%  | 681  |
| LPP60_RAT | LYPGIPASLVR                                                                                                                    | 1%  | 564  |
| THIM_RAT  | DFTATDLTEFAAR                                                                                                                  | 3%  | 397  |
| COA1_RAT  | AIGIGAYLVR<br>GVINDILDWK<br>VDPVYIRLAER<br>LLETESFQLNR<br>LGGIPVGVVAVETR<br>NSISNFLHSLER<br>IGSFGPQEDLLFLR<br>EVFFMNTQSIVQLVQR | 4%  | 2345 |
| HMCS2_RAT | APLVLEQGLR<br>LEVGTETIIDK                                                                                                      | 4%  | 508  |
| MET7B_RAT | VTCVDPNPNFEK                                                                                                                   | 4%  | 244  |
| PYGL_RAT  | DFSELEPDK<br>VLYPNDNFFEGK                                                                                                      | 2%  | 850  |
| PYGB_RAT  | SSKFGCR<br>VLYPNDNFFEGK                                                                                                        | 2%  | 838  |
| ENOA_RAT  | AGAVEK<br>AGKYDLDFK<br>YITPDQLADLYK<br>DATNVGDEGGFAPNILENK                                                                     | 11% | 434  |
| F16P1_RAT | DFDPAINIYIQR<br>AGGLATTGNEDILDIVPTEIHQK                                                                                        | 9%  | 363  |
| ALDOA_RAT | QLLLTADDR<br>DGADFAKWR<br>GILAADESTGSIK                                                                                        | 8%  | 364  |
| ALDOB_RAT | ATQEAFMK<br>LDQGGAPLAGTNK<br>ALQASALAAWGGK<br>ETTIQGLDGLSER<br>GILAADESVGTMGNR<br>YTPEQVAMATVTALHR                             | 21% | 364  |



|           |                                                                                                                                                                                                                                                                                                                                                 |     |      |
|-----------|-------------------------------------------------------------------------------------------------------------------------------------------------------------------------------------------------------------------------------------------------------------------------------------------------------------------------------------------------|-----|------|
| G3P_RAT   | GGAKR<br>AGAHLK<br>TVDGPSGK<br>VVDLMAYMASK<br>VVDLMAYMASKE<br>GAAQNIPASTGAAK<br>LISWYDNEYGYSNR<br>VIISAPSADAPMFVMGVNHEK                                                                                                                                                                                                                         | 24% | 333  |
| PPCKC_RAT | TVIITQEQR<br>FLWPGFGENSR<br>VIQGLDLSLPQEV<br>MGTSVLEALGDGEFIK<br>EIIISFGSGYGGNSLLGK<br>AINPENGGFGVAPGTSVK<br>TMYVIPFSMGPLGSPLAK                                                                                                                                                                                                                 | 17% | 622  |
| KPYR_RAT  | QLFEELR<br>KASDVLAVR<br>DALGPEGQNIK<br>GDLGIEIPAEK<br>GSQVLVTVDPK<br>STSIATIGPASR<br>SAQLLSQYRPR<br>EPPEAIWADDVDR<br>IYIDDGLISLVVQK<br>DPTEVTAIGAVEASF<br>K<br>TGVLQGGPESEVEIVK<br>FGVQHNVDIIFASFVR<br>IGPEGLVTEVEHGGILGSR<br>EATESFATSPLSYRPVAIALDTK<br>GVNLPNTEVDLPGLSEQDLLDLR<br>KGVNLPNTEVDLPGLSEQDLLDLR<br>DPTEVTAIGAVEASF<br>KCCAAAIIVLTK | 39% | 574  |
| KPYM_RAT  | GIFVLCK<br>GDLGIEIPAEK                                                                                                                                                                                                                                                                                                                          | 3%  | 531  |
| PYC_RAT   | FIGPSPEVVR<br>GQIGAPMPGKVIDVK<br>ELIPNIPFQMLLR<br>GLAPVQAYLHIPDIIK                                                                                                                                                                                                                                                                              | 5%  | 1178 |
| PGK1_RAT  | DLMAK<br>KELNYFAK<br>NNQITNNQR                                                                                                                                                                                                                                                                                                                  | 5%  | 417  |
| GCKR_RAT  | TVDQGVVSSQR<br>VIPTALLSLLLR<br>CIESLLQAIHFPQPLSDDVR                                                                                                                                                                                                                                                                                             | 6%  | 627  |

|           |                                                                                                                                                                                                                                                                                                     |     |     |
|-----------|-----------------------------------------------------------------------------------------------------------------------------------------------------------------------------------------------------------------------------------------------------------------------------------------------------|-----|-----|
| GLPK_RAT  | KVQEAVEENR<br>LGQLNIDISNIK<br>TGLPLSTYFSAVK                                                                                                                                                                                                                                                         | 6%  | 524 |
| AL7A1_RAT | ETFAPILYVFK                                                                                                                                                                                                                                                                                         | 4%  | 228 |
| AL9A1_RAT |                                                                                                                                                                                                                                                                                                     | 46% | 494 |
|           | CQVLLEAAR<br>EVNLAVENAK<br>IGDPLEDTR<br>GIKPITLELGGK<br>VSFTGSVPTGMK<br>VTIEYYSQLK<br>MGPLINAPHLER<br>IKIGDPLEDTR<br>SPLIIFSDCNMK<br>ANDTTFGLAAGVFTR<br>GALLANFLTQGVCCNGTR<br>EEIFGPVMSILTFETEAEVLER<br>AGAPNGLFNVVQGAATGQFLCQHR<br>VAAELQAGTCYINNYNVSPVELPFGGYK<br>SAPALACGNAMIFKPSPTVPSALLLAEIYTK |     |     |
| AL3A2_RAT | SGRSRPLR<br>IAFGGETDEATR<br>YIAPTILTDVDPNSK<br>VMQEEIFGPILPIVSVK                                                                                                                                                                                                                                    | 11% | 484 |
| AL1B1_RAT | VAEQTPLSALYLASLIK                                                                                                                                                                                                                                                                                   | 3%  | 519 |
| ALDH2_RAT | LLCGGGAAADR<br>GYFIQPTVFGDVK<br>VAEQTPLTALYVANLIK                                                                                                                                                                                                                                                   | 8%  | 519 |
| LDHA_RAT  | VTLTPDEEAR<br>QVVDSAYEVIK<br>SLNPQLGTDADK                                                                                                                                                                                                                                                           | 10% | 332 |
| DHSA_RAT  | LGANSLLDLVVFR                                                                                                                                                                                                                                                                                       | 2%  | 656 |
| XYLB_RAT  | VVAFTGDNPASLAGMR<br>VWSQAACLDACAPHLK                                                                                                                                                                                                                                                                | 5%  | 536 |
| MDHC_RAT  | EKMDLTAK<br>GEFITTVQQR<br>FVEGLPINDFSR                                                                                                                                                                                                                                                              | 8%  | 334 |
| MMSA_RAT  | TLADAEGDVFR<br>AFPAWADTSILSR                                                                                                                                                                                                                                                                        | 4%  | 535 |

|           |                                                                                                                                                                                                                                                     |     |     |
|-----------|-----------------------------------------------------------------------------------------------------------------------------------------------------------------------------------------------------------------------------------------------------|-----|-----|
| UGDH_RAT  | LAANAFLAQR<br>VTVVDVNEAR<br>VLIGGETPEGQR<br>ILTTNTWSSELSK<br>AVQALCAVYEHVVPK<br>INAWNSPTLPIYEPGLK<br>DVLNLVYLCEALNLPEVAR<br>VLDGLHNELQTIGFQIETIGK<br>IFDANTKPNLNLQVLSNPEFLAEGTAIK                                                                   | 29% | 493 |
| CISY_RAT  | IVPNILLEQGK                                                                                                                                                                                                                                         | 2%  | 466 |
| CGL_RAT   | AVAALDGAK<br>MEKHFR<br>ACAQIVHK<br>ATLGISDTLIR<br>LLEAAITPQTK<br>AVVLPISLATTFK<br>LVWIETPTNPTLK<br>QDSPGQSSGFVYSR                                                                                                                                   | 21% | 398 |
| ADK_RAT   | SLVANLAAANCYK                                                                                                                                                                                                                                       | 3%  | 361 |
| SARDH_RAT | DPSGGPVSLDFVK                                                                                                                                                                                                                                       | 1%  | 919 |
| C1TC_RAT  | VLLSALDR<br>KFSDIQIR<br>DCFIPCTPK<br>TPVPSDIAISR<br>GVPTGFVLPPIR<br>QPSQGPTFGIK<br>DVDGLTSINAGK<br>AYTEEDLDLVEK<br>TDPAALTDDEINR<br>LDIDPETITWQR<br>MFGVPVVVAMNAFK<br>YVVVTGITPTPLGEGK<br>ASQAPSSFQLLYDLK<br>IYGADDIELLPEAQNK<br>LGIEKTDPAALTDDEINR | 18% | 935 |

|           |                                                                                                                                                                                                                                                                                                                                               |     |     |
|-----------|-----------------------------------------------------------------------------------------------------------------------------------------------------------------------------------------------------------------------------------------------------------------------------------------------------------------------------------------------|-----|-----|
| FTHFD_RAT | IGNPLER<br>LSDHPDVR<br>FLFPEGIK<br>GQALPEVVAK<br>YFAGWCDK<br>TDVAAPFGGFK<br>MMPASQFFK<br>EAFENGLWGK<br>DLGEAALNEYLR<br>EESFGPIMIISR<br>SPLIIFADC DLNK<br>ANATEFGLASGVFTR<br>GVVNILPGSGSLVGQR<br>DTNHGPQNHEAHLR<br>ILPNVPEVEDSTDFFK<br>INWDQP AEAIHNWIR<br>ECEVL PDDTVSTLYNR<br>GSASSDLEL TEAELATAEAVR                                         | 25% | 902 |
| FTCD_RAT  | ISSLLQEAK<br>AFAACLGAIK<br>TCALQEGLR<br>AGEYEALPEK<br>L FVLEEEHR<br>LGLDSLAPFDPK<br>VQGIGWYLEEK<br>TQAALVLGSLEAR<br>MGALDVCPFIPVR<br>EAQELNLPVVGSQLVGLVPLK<br>TVYTFVGQPECVVEGALSAAR<br>IIEYLPDSGPEQSLLDASLR<br>QAEWVPDFGPSSFVPSWGATVTGAR<br>SAAPGGGSVAAAVAALGAALASMVGQMTYGR<br>NLAQVSTNLLDFEVTALHTVYEEAR<br>LAETVSQLWPALQELAQC GNLSCLSDLQVAAK | 50% | 541 |
| CBS_RAT   | VWISPDTPSR<br>CEFFNAGGSV<br>SNDDDSFAFAR                                                                                                                                                                                                                                                                                                       | 5%  | 561 |
| SAHH_RAT  | ESLIDGIKR<br>VADIGLAAWGR<br>VAVVAGYGDVGK                                                                                                                                                                                                                                                                                                      | 7%  | 432 |
| BHMT1_RAT | ALFEK<br>EATTEQQLR<br>AIAEELAPER<br>AGPWTPEAAVEHPEAVR                                                                                                                                                                                                                                                                                         | 10% | 407 |

|           |                      |     |     |
|-----------|----------------------|-----|-----|
| BHMT2_RAT | AGANIIGVNCR          | 5%  | 363 |
|           | AIAEELAPER           |     |     |
| CSAD_RAT  | IDQAFALTR            | 19% | 493 |
|           | ALPPLALFTSK          |     |     |
|           | GAAFLGLGTDSVR        |     |     |
|           | TLDGDPVAVEALLR       |     |     |
|           | LLAAGLQCSALLLR       |     |     |
|           | FFNQLFSGLDPHALAGR    |     |     |
|           | FYNVALDTGDKVVQCGR    |     |     |
| ARGI1_RAT | VMEETFSYLLGR         | 15% | 323 |
|           | TGLLSGLDIMEVNPTLGK   |     |     |
|           | DHGDLAFVDVPNDSPFQIVK |     |     |
| ASSY_RAT  | GQVYILGR             | 21% | 412 |
|           | VFIEDVSK             |     |     |
|           | KQVEIAQR             |     |     |
|           | KVFIEDVSK            |     |     |
|           | NQAPPGLYTK           |     |     |
|           | QHGIPIPVTPK          |     |     |
|           | APNTPDVLEIEFK        |     |     |
|           | FELTCYSLAPQIK        |     |     |
|           | EQGYDVIAYLANIGQK     |     |     |
| ARLY_RAT  | NPDSLELIR            | 13% | 461 |
|           | NDQVVTDLR            |     |     |
|           | VAEEWAQGIFK          |     |     |
|           | HLWNVDLQGSK          |     |     |
|           | SRNDQVVTDLR          |     |     |
|           | INVLPLGSGAIAGNPLGVDR |     |     |

|          |                                                                                                                                                                                                                                                                                                                                                                                                                                                                                                                                                                                                                                                                                                                                                                                              |     |      |
|----------|----------------------------------------------------------------------------------------------------------------------------------------------------------------------------------------------------------------------------------------------------------------------------------------------------------------------------------------------------------------------------------------------------------------------------------------------------------------------------------------------------------------------------------------------------------------------------------------------------------------------------------------------------------------------------------------------------------------------------------------------------------------------------------------------|-----|------|
| CPSM_RAT | IYAIK<br>TSINVVR<br>VVAVDCGIK<br>ELSEPSSTR<br>APMFSWPR<br>SVGEVMAIGR<br>EIEYEVVR<br>LRDADPILR<br>VPAIYGVDTR<br>EWPANLDR<br>FVHDNYVIR<br>IALGIPLPEIK<br>SLGQWLQEEK<br>SIFSAVLDELK<br>ATGYPLAFIAAK<br>VSQEHPVVLTK<br>IMGTSPLQIDR<br>TLGVDFIDVATK<br>EVEMDAVGKEGR<br>AADTIGYPVMIR<br>GQNQPVLNITNR<br>AQTAHIVLEDGTK<br>AFAMTNQILVER<br>LTSIDKWFLYK<br>GLNSESVTEETLR<br>ALENNMSLDEIVK<br>SAYALGGLGSGICPNK<br>QLFSDKLNEINEK<br>FLGVAEQLHNEGFK<br>IAPSFAVESMEDALK<br>VLGTSVESIMATEDR<br>AFAISGPFNVQFLVK<br>GTTITSVLPKALVASR<br>IEFEGQSVDFVDPNK<br>DGSIDLVINLPNNNTK<br>TAVDSGIALLTNFQVTK<br>EPLFGISTGNIITGLAAGAK<br>RTAVDSGIALLTNFQVTK<br>TVLMNPNIASVQTNEVGLK<br>QADAVYFLPITPQFVTEVIK<br>SLGQWLQEEKVPAIYGVDTR<br>VLILGSGLSIGQAGEFDYSGSQAVK<br>AERPDGLILGMGGQTALNCGVELFK<br>IEFEGQSVDFVDPNKQNLIAEVSTK | 36% | 1500 |
| GGLO_RAT | TYGCSPEVYYQPTSVVEVR                                                                                                                                                                                                                                                                                                                                                                                                                                                                                                                                                                                                                                                                                                                                                                          | 4%  | 440  |
| PH4H_RAT | VEVLDNTQQLK<br>NDIGATVHELRSR                                                                                                                                                                                                                                                                                                                                                                                                                                                                                                                                                                                                                                                                                                                                                                 | 5%  | 453  |

|           |                       |     |     |
|-----------|-----------------------|-----|-----|
| KMO_RAT   | KVINR                 | 5%  | 478 |
|           | MIHSLSGK              |     |     |
|           | EDIRVANFMR            |     |     |
| ATPA_RAT  | VHGLR                 | 10% | 553 |
|           | LELAQYR               |     |     |
|           | NLHASNTR              |     |     |
|           | AVDSLVPGR             |     |     |
|           | ISVREPMQTGIK          |     |     |
|           | TGTAEMSSILEER         |     |     |
| ATPB_RAT  | IPVGPETLGR            | 12% | 529 |
|           | TIAMDGTEGLVR          |     |     |
|           | IMNVIGEPIDER          |     |     |
|           | VALVYQMNPPGAR         |     |     |
|           | IMDPNIVGSEHYDVAR      |     |     |
| KCRS_RAT  | AGVHVRIPK             | 5%  | 419 |
|           | GLSLPPACSR            |     |     |
| COX41_RAT | SEDYALPSYVDR          | 7%  | 169 |
| NDUS1_RAT | QDLPK                 | 3%  | 727 |
|           | DLLNK                 |     |     |
|           | AVEDKNIGPLVK          |     |     |
| CYB5_RAT  | YYTLEEIQK             | 41% | 134 |
|           | TYIIGELHPDDR          |     |     |
|           | FLEEHPGGEEVLR         |     |     |
|           | EQAGGDATENFEDVGHSTDAR |     |     |
| ETFA_RAT  | MFRAAAPGQLR           | 12% | 333 |
|           | LNVAPVSDIIEIK         |     |     |
|           | APSSSSAGISEWLDQK      |     |     |
| 3BHS5_RAT | GDIVDAQFLR            | 6%  | 373 |
|           | DLGYEPLVSWEEAK        |     |     |
| DHB12_RAT | LGEWAVVTGGTDGIGK      | 5%  | 312 |
| DHB13_RAT | ALTAELDTLGK           | 13% | 300 |
|           | LWPVLEPDEVAR          |     |     |
|           | TSCLCPVFNVTGFTK       |     |     |
| DHRS8_RAT | ALTDELAALGCTGVR       | 5%  | 298 |
| AK1D1_RAT | TQAQIVLR              | 25% | 326 |
|           | DELLTSLGK             |     |     |
|           | SLGVSNFNR             |     |     |
|           | HIDGAYVYR             |     |     |
|           | NEHEVGEAIR            |     |     |
|           | EEMKDIEALNK           |     |     |
|           | QLEVILNKPGLK          |     |     |
|           | NPLWVNVSSPPLLK        |     |     |
| DIDH_RAT  | IAIDNGFR              | 12% | 322 |
|           | QTPALVALR             |     |     |
|           | VALNDGNFIPVLGFGTTVPEK |     |     |

|           |                                                                                                                                                    |     |     |
|-----------|----------------------------------------------------------------------------------------------------------------------------------------------------|-----|-----|
| DHI1_RAT  | KVIVTGASK<br>IMEFLSLR<br>KDEVYYDK<br>FALDGFFSTIR<br>ETSGIILSQAAPK<br>MTQPLIASYSASK<br>SSWTPLLLGNPGR                                                | 26% | 288 |
| PERT_RAT  | DILGGK<br>GLLARPAK                                                                                                                                 | 2%  | 914 |
| RDH3_RAT  | TNVTNMER<br>VAIIEPGGFK<br>VVNIASTMGR<br>LETVILDVTK<br>YGVEAFSDSLR<br>LWDQTTEEVK<br>TESIVAATQWVK<br>KLWDQTTEEVK<br>YGVEAFSDSLRR<br>LWDQTTEEVKEIYGEK | 24% | 317 |
| RDH7_RAT  | TNVTNMER<br>VAIIEPGGFK<br>VVNIASTMGR<br>LETVILDVTK<br>YGVEAFSDSLR<br>TESIVAATQWVK<br>KLWDQATEEVK<br>YGVEAFSDSLRR                                   | 23% | 317 |
| RETST_RAT | ATVQSVLLDSAGR                                                                                                                                      | 2%  | 609 |
| VKGC_RAT  | TKLQDIK<br>GLSSLDRK<br>KLQEIER<br>AAPASDKVQK<br><b>Iron Metabolism</b>                                                                             | 4%  | 758 |
| FRIH_RAT  | DDVALKNFAK<br>ELGDHVTNLR<br>SVNQSLLELHK<br>QNYHQDSEAINR<br>MGAPESGMAEYLFDK                                                                         | 32% | 182 |
| FRIL1_RAT | TLEAMEAALALEK<br>QNYSTEVEAAVNR<br>ALFQDVQKPSQDEWGK                                                                                                 | 22% | 183 |



|           |                                                                                                                                                                                                                                          |     |     |
|-----------|------------------------------------------------------------------------------------------------------------------------------------------------------------------------------------------------------------------------------------------|-----|-----|
| IREB1_RAT | FEFLK<br>GPFLGK<br>DFESCLGAK<br>AVLAESYER<br>SWNALAAPSEK<br>YQQAGLPLIVLAGK<br>TSLSPGSGVVTYYLR<br>ANYLASPPLVIAYAIAGTVR<br>VILQDFTGVPAVVDFEAMR<br>IIPPGSGIIHQVNLEYLAR                                                                      | 14% | 889 |
| CP2A1_RAT | YLPGPQQQIIK<br>DVYSSITQLSER<br>EALVDQAEFEFSGR                                                                                                                                                                                            | 7%  | 492 |
| CP2A2_RAT | RFCLGDSLAK<br>YLPGPQQQIIK<br>DVYSSITQLSER<br>EALVDQAEFEFSGR                                                                                                                                                                              | 9%  | 492 |
| CP4A2_RAT | LYSPVPSVSR<br>ELSSPVTFPDGR<br>ACQIAHEHTDGVK                                                                                                                                                                                              | 7%  | 504 |
| CP2B3_RAT | ATLDPNAPR<br>EIDQVIGSQR                                                                                                                                                                                                                  | 4%  | 491 |
| CP2CB_RAT | VQEEIER<br>ICAGEALAR<br>DFIDCFLNK<br>IQEEAQCLVEELR                                                                                                                                                                                       | 7%  | 500 |
| CP2CN_RAT | EALLQQGDEFGLR                                                                                                                                                                                                                            | 2%  | 494 |
| CP2D1_RAT | FSVSTLR<br>CLGVKPR<br>RFSVSTLR<br>ACLGEPLAR<br>SLEEWVTK<br>YGDVFSLQK<br>TTWDPAQPPR<br>FGDIAPLNLPR<br>FEYEDPYLIR<br>NLTAFLAEVEK<br>ALCNVIASLIFAR<br>GNPESSFNDENLR<br>VQQEIDEVIGQVR<br>SQGVILASYGPEWR<br>TFMALLDNLLAENR<br>FHPEHFLDAQGNFVK | 32% | 504 |

|           |                                                                                                                                                                                                                      |     |     |
|-----------|----------------------------------------------------------------------------------------------------------------------------------------------------------------------------------------------------------------------|-----|-----|
| CP2D3_RAT | IPGLADK<br>FSVSTLR<br>TWDPDQPPR<br>HEAFMPFSAGR<br>DETVWEKPLR<br>GTTLIPNLSSVLK<br>GVVLAPYGPEWR<br>DLTDAFLAEIEK<br>FADIVPMNLPHK<br>GNPESSFNDANLR<br>VQQEIDEVIGQVR                                                      | 24% | 500 |
| CP2D4_RAT | RPEMADQAR<br>HEAFMPFSAGR<br>DETVWEKPLR<br>GNPESSFNDENLR<br>VQQEIDEVIGQVR<br>MPFTNAVIHEVQR                                                                                                                            | 14% | 500 |
| CP2DA_RAT | IPGLADK<br>FSVSTLR<br>TTWDPAQPPR<br>FGDIAPLNLR<br>HEAFMPFSAGR<br>DETVWEKPLR<br>FEYEDPYLIR<br>NLTDAFLAEVEK<br>GNPESSFNDENLR<br>VQQEIDEVIGQVR                                                                          | 21% | 504 |
| CP2DQ_RAT | FSVSTLR<br>SWDPAQPPR<br>RPEMADQAR<br>LNSFIALVDK<br>HEAFMPFSAGR<br>DETVWEKPLR<br>GTTLIPNLSSVLK<br>GVVLAPYGPEWR<br>AVSNVIASLVYAR<br>DMTDAFLAEMQK<br>GNPESSFNDENLR<br>VHEEIDEVIGQVR<br>MPFTNAVIHEVQR<br>FADIVPTNIPHMTSR | 32% | 500 |
| UD16_RAT  | NTILVK<br>ACLLPAAR<br>MACLLPAAR<br>DSATLSFLR<br>AMEIAEALGR<br>YDFVFEYPRPVMNMFIFGGTNCK                                                                                                                                | 10% | 529 |

|          |                                                                                         |     |     |
|----------|-----------------------------------------------------------------------------------------|-----|-----|
| UD18_RAT | NTILVK<br>AMEIAEALGR<br>VWNHLSYMK                                                       | 5%  | 530 |
| UDB1_RAT | TPLVYSLR<br>IVMNDPSYK<br>ANVVASALAQIPQK                                                 | 6%  | 529 |
| UDB2_RAT | TPATLGPNTR<br>IILDELVQR<br>LLDVWTYELPR<br>ANAIAWALAQIPQK<br>FILPPSYVPVILSGLAGK          | 12% | 530 |
| UDB3_RAT | TPATLGPNTR<br>TILDELVQR<br>LVDVWTYELQR<br>ANAIAWALAQIPQK                                | 8%  | 530 |
| UDB5_RAT | TILDELVQR<br>ANAIAWALAQIPQK                                                             | 4%  | 530 |
| NCPR_RAT | LEQLGAQR<br>IQTTAPPVK<br>SDEDYLYR<br>NPFLAAVTANR<br>EVGETLLYYGCR                        | 7%  | 678 |
| ADH1_RAT | AHEVR<br>GAIFGGFK<br>GALLDGTSR<br>LVADFMAK<br>IDAAAPLDK<br>INEAFDLLR                    | 12% | 376 |
| CES3_RAT | IGASTQAAQR<br>TPEEILAEK<br>TEDELLETSLK<br>DGASEEETNLSK<br>TTTSAVMVHCLR<br>QKTEDELLETSLK | 9%  | 565 |

|           |                                                                                                                                                                                                 |     |     |
|-----------|-------------------------------------------------------------------------------------------------------------------------------------------------------------------------------------------------|-----|-----|
| HYEP_RAT  | LLAQDIR<br>NEFDWR<br>ASPPLEGSR<br>IPLLTPDK<br>KGLNSVATAR<br>ELEDGGLER<br>VETSDEEIK<br>EDESIRPFK<br>DIELLYPYK<br>LISYSYMER<br>GGHFAAFEEPK<br>ENLGQGIMVHK<br>SFYTMTPLLGQR<br>VfVPTGFSAFPSELLHAPEK | 30% | 455 |
| AAAD_RAT  | TPTPGSLELAQK                                                                                                                                                                                    | 3%  | 398 |
| ARK72_RAT | QVETELLPCR                                                                                                                                                                                      | 2%  | 367 |
| ARK73_RAT | AAPMFGK<br>TLKPADVR<br>MDVTSSSASVR<br>FYAFNPLAGLLTGR                                                                                                                                            | 12% | 327 |
| MGST1_RAT | VFANPEDCAGFGK                                                                                                                                                                                   | 8%  | 155 |
| GSTA1_RAT | QIEEAR<br>FLQPGSQR<br>AILNYIATK<br>FIQSPEDLEK                                                                                                                                                   | 15% | 222 |
| GSTA2_RAT | QIEEAR<br>FLQPGSQR<br>AILNYIATK<br>LIQSPEDLEK                                                                                                                                                   | 15% | 222 |
| GSTK1_RAT | ETTGAACK<br>DEDITESQNILSAAEK                                                                                                                                                                    | 11% | 226 |
| GSTM1_RAT | FEGLK<br>ADIVENQVMDNR                                                                                                                                                                           | 8%  | 218 |
| GSTM2_RAT | FEGLK<br>QPWFAGNK<br>VDVLENQAMDTR<br>HNLCGETEEERIR                                                                                                                                              | 17% | 218 |
| TPST1_RAT | DCLTKWNR<br>ASVHSMISRK                                                                                                                                                                          | 5%  | 370 |
| ST1A1_RAT | NTFTVAQNER                                                                                                                                                                                      | 3%  | 291 |
| THTR_RAT  | ATLNR<br>SGKVGPSLR<br>VHQVLYR<br>TVSVLNGGFR<br>VLDASWYSPGTR<br>TYEQVLENLQSK<br>YLGTQPEPDAVGLDSGHIR                                                                                              | 24% | 297 |

|           |                                                                                 |     |      |
|-----------|---------------------------------------------------------------------------------|-----|------|
| FMO3_RAT  | NAILTQWDR<br>LQEYITSFATEK<br>ASIYQSVFTNSSK<br>SCLEEGLEPTCFER                    | 9%  | 531  |
| FMO5_RAT  | GYPIDILLSSR                                                                     | 2%  | 533  |
| CAH3_RAT  | VVFDDTFDR<br>GDNQSPIELHTK<br>HDPSLQPWSVSYDPGSAK                                 | 15% | 260  |
| CATA_RAT  | QWKEQR<br>ARVANYQR<br>LAQEDPDYGLR<br>DAMLFPSFIHSQK<br>EAETFPFNPFDLTK            | 10% | 527  |
| PRDX1_RAT | LVQAFQFTDK<br>QITINDLPVGR                                                       | 11% | 199  |
| ADO_RAT   | HIQDIVAATLK<br>MTWISPVTLLEELVEAK<br>DLEPLILTIEEAIQHK                            | 3%  | 1333 |
| COMT_RAT  | GQIMDAVIR<br>YLPDTLLLEK                                                         | 7%  | 264  |
| GABT_RAT  | NLLLAEVINIIK<br>IDIPSFWDWPIAPFPR                                                | 5%  | 500  |
| H2A1_RAT  | AGLQFPVGR<br>NDEELNKLLGK<br>VTIAQGGVLPNIQAVLLPK                                 | 30% | 130  |
| H2A1C_RAT | AGLQFPVGR<br>VTIAQGGVLPNIQAVLLPK                                                | 21% | 130  |
| H2AZ_RAT  | AGKDSGK<br>AVSRSQR<br>AGLQFPVGR<br>GDEELDSLIIK                                  | 25% | 128  |
| H2B1_RAT  | EIQTA VR<br>HAVSEGTK<br>LLPGELAK<br>ESYSVYVYK<br>QVHPDTGISSK<br>AMGIMNSFVNDIFER | 44% | 125  |
| H2B1A_RAT | EIQTA VR<br>HAVSEGTK<br>LLPGELAK<br>QVHPDTGISSK                                 | 28% | 127  |
| H4_RAT    | VFLENVIR<br>DAVITYTEHAK<br>ISGLIYEETR<br>DNIQGITKPAIR                           | 38% | 103  |

|           |                                                                                                   |     |      |
|-----------|---------------------------------------------------------------------------------------------------|-----|------|
| H12_RAT   | AKKPAGAAK<br>KATGTATPK<br>ATGTATPKK<br>AKKPAAAAGAK<br>ALAAAGYDVEK<br>GTGASGSFKLNK<br>ASGPPVSELITK | 33% | 219  |
| H33_RAT   | STELLIR<br>LPFQRLVR                                                                               | 11% | 136  |
| NUCB2_RAT | AATADLEQYDR<br>QEYQQAVQQLEQK<br>EVWEETDGLDPNDFDPK                                                 | 10% | 420  |
| DNL1_RAT  | GISLR<br>QPLSR<br>AARGMVDK<br>LTGSASMAK<br>GISLRFPR<br>AVPESDSPVK                                 | 4%  | 918  |
| XPO1_RAT  | YYGLQILENVIK                                                                                      | 1%  | 1071 |
| IMB1_RAT  | AAVENLPTFLVELSR                                                                                   | 1%  | 875  |
| TRI69_RAT | LPLLK<br>ELQSLR<br>WYWEIEVAK                                                                      | 4%  | 499  |
| CK065_RAT | QEMAARIQK<br>HIEDLCANSR                                                                           | 6%  | 305  |
| LRC46_RAT | ATSSTQMASSSK                                                                                      | 3%  | 323  |
| RENBP_RAT | VALTIK<br>QVWMYCR                                                                                 | 3%  | 419  |
| TSPY1_RAT | VTEVVDVK<br>CSGAFARIK                                                                             | 5%  | 334  |

---
